# Supplementary material for: Evaluation of Lacustrine Groundwater Discharge, Hydrologic Partitioning, and Nutrient Budgets in a Proglacial Lake in Qinghai-Tibet Plateau: Using 222 Rn and Stable Isotopes
Source: Copernicus journal article supplement (doi:10.5194/hess-2018-26), 2018-02-12
Supplement: Supplementary file [file hess-2018-26-AC3-supplement.pdf]

1 *Revised MS submitted to HESS*

Deleted: Confidential

2 **Evaluation of Lacustrine Groundwater Discharge, Hydrologic**  
3 **Partitioning, and Nutrient Budgets in a Proglacial Lake in**  
4 **Qinghai-Tibet Plateau: Using <sup>222</sup>Rn and Stable Isotopes**

6 **Xin LUO<sup>1,2</sup>, Xingxing Kuang<sup>3</sup>, Jiu Jimmy Jiao<sup>1,2\*</sup>, Sihai Liang<sup>4</sup>, Rong Mao<sup>1,3</sup>,**

Deleted: X

7 **Xiaolang Zhang<sup>1,3</sup>, and Hailong Li<sup>3</sup>**

9 <sup>1</sup>Department of Earth Sciences, The University of Hong Kong, P. R. China

10 <sup>2</sup>The University of Hong Kong, Shenzhen Research Institute (SRI), Shenzhen, P. R.  
11 China

12 <sup>3</sup>School of Environmental Science and Engineering, Southern University of Science  
13 and Technology, 1088 Xueyuan Rd., Shenzhen, China

Deleted: School of Environmental Science and Engineering, South University of Science and Technology of China (SUSTech), Shenzhen, China.

14 <sup>4</sup>School of Water Resources & Environment, China University of Geosciences, 29  
15 Xueyuan Road, Beijing, China

19 Corresponding author: Jiu Jimmy Jiao (jjiao@hku.hk)

20 Department of Earth Sciences, The University of Hong Kong

21 Room 302, James Lee Science Building, Pokfulam Road, Hong Kong

22 Tel (852) 2857 8246; Fax (852) 2517 6912

23

24

25

32 **Abstract**

33 Proglacial lakes are good natural laboratories to investigate groundwater and  
34 glacier dynamics under current climate condition and to explore biogeochemical  
35 cycling under pristine lake status. This study conducted a series of investigations of  
36  $^{222}\text{Rn}$ , stable isotopes, nutrients and other hydrogeochemical parameters in Ximen Co  
37 Lake, a remote proglacial lake in the east of Qinghai-Tibet Plateau (QTP). A radon  
38 mass balance model was used to quantify the lacustrine groundwater discharge (LGD)  
39 of the lake, leading to an LGD estimate of  $10.3 \pm 8.2 \text{ mm d}^{-1}$ . Based on the three end  
40 member models of stable  $^{18}\text{O}$  and  $\text{Cl}^-$ , the hydrologic partitioning of the lake is  
41 obtained, which shows that groundwater discharge only accounts for 7.0 % of the  
42 total water input. The groundwater derived DIN and DIP loadings constitute 42.9 %  
43 and 5.5 % of the total nutrient loading to the lakes, indicating the significance of LGD  
44 in delivering disproportionate DIN into the lake. This study presents the first attempts  
45 to evaluate the LGD and hydrologic partitioning in the glacial lake by coupling  
46 radioactive and stable isotopic approaches and the findings advance the understanding  
47 of nutrient budgets in the proglacial lakes of QTP. The study is also instructional in  
48 revealing the hydrogeochemical processes in proglacial lakes elsewhere.

49 **Keywords:** Proglacial lake;  $^{222}\text{Rn}$ ; lacustrine groundwater discharge; hydrologic  
50 partitioning; nutrient budgets.

Deleted: primary productivity

Deleted: The primary productivity of the lake water is calculated to be  $0.41 \text{ mmol m}^{-2} \text{ d}^{-1}$ .

Deleted: and primary productivity

Deleted: ; primary productivity

57

## 58 1. Introduction

59 High altitude and latitude areas are intensively influenced by the melting of  
60 glaciers due to climatic warming. Of particular importance are the proglacial areas,  
61 such as proglacial lakes and moraines, because they are particularly affected by  
62 climatic change induced glacier retreating and thawing of permafrost (Barry 2006,  
63 Heckmann et al. 2015, Slaymaker 2011). The proglacial lakes are usually located  
64 close to ice front of a glacier, ice cap or ice sheet, with the vicinity to the ice front  
65 sometimes defined as the areas with subrecent moraines and formed by the last  
66 significant glacier advances at the end of the Little Ice Age (Barry 2006, Harris et al.

67 2009, Heckmann et al. 2015, Slaymaker 2011). These lakes are located in the  
68 transition zones from glacial to non-glacial conditions, and can serve as natural  
69 laboratories to explore hydrological processes, biogeochemical cycles and  
70 geomorphic dynamics under current climatic conditions (Dimova et al. 2015,  
71 Heckmann et al. 2015).

72 The Qinghai-Tibet Plateau (QTP), the third pole of the world, serves as the water  
73 tower of most of the major rivers in Asian (Qiu 2008). Unique landscapes such as endorheric  
74 lakes, permafrost, glaciers, and headwater fluvial networks are developed due to the intensive  
75 interaction between the atmosphere, hydrosphere, biosphere and cryosphere (Lei et al. 2017,

Deleted: Proglacial

Deleted: providing

Deleted: (Qiu 2008)

Deleted: coherent

80 Yao et al. 2013, Yao et al. 2012, Zhang et al. 2017a, Zhang et al. 2017b). Distributed  
81 mountainous glaciers and lakes are the most representative landscapes and are highly  
82 sensitive to the climate changes. In the past decade, the lakes in the interior of the QTP show  
83 overall expanding with respect to an overall increase of precipitation, accelerated glacier  
84 melting and permafrost degradation (Heckmann et al. 2016, Yang et al. 2014, Zhang et al.  
85 2017a, Zhang et al. 2017b, Zhang et al. 2013). Some latest studies have made effects to depict  
86 the hydrologic partitioning of the majority of the lakes in the QTP based on long term  
87 observation of climatological parameters, and remote sensing approaches. However, so far a  
88 quantitative evaluation of the water balance and hydrologic partitioning, especially the  
89 groundwater component of the lakes in the QTP is limited due to the scarcity of observational  
90 data. Therefore, there is a great need to conduct refined and systematical field observation to  
91 provide groundtruth dataset and tenable models to depict the water balance and hydrologic  
92 partitioning of the lakes, especially proglacial lakes in the QTP (Yang et al. 2014, Zhang et al.  
93 2017b).

Deleted: and deepening

Deleted: as far as now,

Deleted: refining and

Deleted: led

Deleted: ed

94 Mountainous proglacial lakes, formed by glacial erosion and filled by melting  
95 glaciers, are widely distributed in the Qinghai-Tibet Plateau (QTP), especially along  
96 the substantial glacier retreating areas of Himalaya Mountains (MT.), Qilian MT.,  
97 Tienshan MT., etc. Characterized by higher elevations, small surface areas but  
98 relatively large depths, mountainous proglacial lakes in QTP lack systematic

Deleted:

105 field-based hydrological studies due to their remote locations and difficulty in  
106 conducting field work (Bolch et al. 2012, Farinotti et al. 2015, Yao et al. 2012).

107 There has been extensive recognition of the importance of groundwater discharge  
108 to various aquatic systems for decades (Dimova and Burnett 2011, Johannes 1980,  
109 Valiela et al. 1978). Very recently, the topic of ‘lacustrine groundwater discharge  
110 (LGD)’, which is comprehensively defined as groundwater exfiltration from lake  
111 shore aquifers to lakes (Blume et al. 2013, Lewandowski et al. 2015, Lewandowski et  
112 al. 2013, Rosenberry et al. 2015), has been introduced. LGD is analogous of in  
113 submarine groundwater discharge (SGD) in coastal environments. LGD plays a vital  
114 role in lake hydrologic partitioning, which is defined as the separation of groundwater  
115 discharge/exfiltration, riverine inflow, riverine outflow infiltration, surface  
116 evaporation and precipitation for the hydrological cycle of the lake (Good et al. 2015,  
117 Luo et al. 2017). LGD also serves as an importance component in delivering solutes  
118 to lakes since groundwater is usually concentrated in nutrients, CH<sub>4</sub>, dissolved  
119 inorganic/organic carbon (DIC/DOC) and other geochemical components (Belanger et  
120 al. 1985, Dimova et al. 2015, Lecher et al. 2015, Paytan et al. 2015). Nutrients and  
121 carbon loading from groundwater greatly influences ratios of dissolved inorganic  
122 nitrogen (DIN) to dissolved inorganic phosphate (DIP) (referred as N: P ratios  
123 thereafter), ecosystem structure and the primary productivity of the lake aquatic

124 system (Belanger et al. 1985, Hagerthey and Kerfoot 1998, Nakayama and Watanabe  
125 2008).

126 LGD studies utilize various methods including direct seepage meters (Lee 1977,  
127 Shaw and Prepas 1990), geo-tracers such as radionuclides, stable  $^2\text{H}$  and  $^{18}\text{O}$  isotopes  
128 (Gat 1995, Kluge et al. 2007, Kraemer 2005, Lazar et al. 2008), heat and temperature  
129 (Liu et al. 2015, Sebok et al. 2013), numerical modeling (Smerdon et al. 2007, Winter  
130 1999, Zlotnik et al. 2009, Zlotnik et al. 2010) and remote sensing (Anderson et al.  
131 2013, Lewandowski et al. 2013, Wilson and Rocha 2016). Recently, some researchers  
132 started to investigate groundwater dynamics in peri- and proglacial areas, mostly  
133 based on the approaches of numerical modeling (Andermann et al. 2012, Lemieux et  
134 al. 2008a, Lemieux et al. 2008b, Lemieux et al. 2008c, Scheidegger and Bense 2014).  
135 However, the quantification of groundwater and surface water exchange in proglacial  
136 lakes is still challenging due to limited hydrogeological data and extremely seasonal  
137 variability of aquifer permeability (Callegary et al. 2013, Dimova et al. 2015, Xin et al.  
138 2013).

139  $^{222}\text{Rn}$ , a naturally occurring inert gas nuclide highly concentrated in groundwater,  
140 can be more applicable in fresh aquatic systems and has been widely used as a tracer  
141 to quantify groundwater discharge in fresh water lakes (Corbett et al. 1997, Dimova et  
142 al. 2015, Dimova and Burnett 2011, Dimova et al. 2013, Kluge et al. 2007, Kluge et al.

143 2012, Luo et al. 2016, Schmidt et al. 2010) and terrestrial rivers and streams  
144 (Batlle-Aguilar et al. 2014, Burnett et al. 2010, Cook et al. 2006, Cook et al. 2003). Of  
145 particular interest are investigations of temporal  $^{222}\text{Rn}$  distribution in lakes, since it  
146 can be used to quantify groundwater discharge and reflect the locally climatological  
147 dynamics (Dimova and Burnett 2011, Luo et al. 2016). Temporal radon variations  
148 give high resolution estimates of groundwater discharge to lakes over diel cycles,  
149 allowing evaluation of LGD and the associated chemical loadings. However, there has  
150 been no study of radon-based groundwater discharge in mountainous proglacial lakes,  
151 especially for those lakes in the QTP.

152 This study aims to investigate the groundwater surface water interactions for the  
153 proglacial lake of Ximen Co, by estimating the LGD and evaluating the hydrologic  
154 partitioning of the lake. LGD is estimated with  $^{222}\text{Rn}$  mass balance model, and the  
155 hydrologic partitioning of the lake is obtained with the three endmember model  
156 coupling the mass balance of water, stable isotopes and  $\text{Cl}^-$ . ~~Moreover,~~ LGD derived  
157 nutrients are estimated and the nutrient budgets of the lake are depicted. ~~This study,~~  
158 to our knowledge, makes the first attempt to quantify the LGD, hydrologic partition,  
159 and groundwater borne nutrients of the proglacial lake in QTP and elsewhere via the  
160 approach integrating multiple tracers. This study provides insights of hydrologic  
161 partitioning in a typical mountainous proglacial lake under current climate condition

**Deleted:** Then,

**Deleted:** Finally, primary productivity  
the lake water is calculated based on the  
nutrient budgets.

166 and reveals groundwater borne chemical loadings in this proglacial lake in QTP and  
167 elsewhere.

168

## 169 **2. Methodology**

### 170 2.1 Site descriptions

171 The Nianbaoyeze MT., located at the eastern margin of the QTP and being the  
172 easternmost part of NW-SW trending Bayan Har Shan, is situated at the main water  
173 divide of the upper reaches of Yellow River and Yangtze River (Figure 1). With a peak  
174 elevation of 5369 m, the mountain rises about 500-800 m above the surrounding  
175 peneplain and displays typical Pleistocene glacial landscapes such as moraines,  
176 U-shaped valleys and cirques (Lehmkuhl 1998, Schlutz and Lehmkuhl 2009,  
177 Wischnewski et al. 2014). The present snow line is estimated to be at an elevation of  
178 5100 m (some updated references) (Schlutz and Lehmkuhl 2009). Controlled by the  
179 South Asia and East Asia monsoons, the mountain has an annual precipitation of 975  
180 mm in the southern part and 582 mm in the northwestern part, with 80 % occurring  
181 during May and October (Yuan et al. 2014, Zhang and Mischke 2009). The average  
182 temperature gradient is about 0.55 °C per 100 m, and the closest weather station,  
183 locating in Jiuzhi town (N: 33.424614 °, E: 101.485998) at the lower plains of the  
184 mountain, recorded a mean annual temperature of 0.1 °C. Snowfalls occur in nearly



185 10 months of the entire year and there is no free-frost all year around (Böhner 1996,  
186 2006, Schlutz and Lehmkuhl 2009). The precipitation, daily bin-averaged wind speed  
187 and temperature in Aug, 2015 were recorded to be 90 mm, 0.7 m s<sup>-1</sup> and 9.5 °C from  
188 Jiuzhi weather station (Figure 2). The water surface evaporation was recorded to be  
189 1429.8 mm in 2015 from Jiuzhi weather station.

190 Among the numerous proglacial lakes developed in the U-shaped valleys of the  
191 Nianbaoyeze MT., Ximen Co lake is located at the northern margin of the mountain  
192 with an elevation of 4030 m asl, and is well studied and easily accessible (Lehmkuhl  
193 1998, Schlutz and Lehmkuhl 2009, Yuan et al. 2014, Zhang and Mischke 2009). The  
194 lake was formed in a deep, glacially eroded basin with a catchment area of 50 km<sup>2</sup>,  
195 and has a mean and a maximum depth of 40 m and 63.2 m, and a surface area of 3.6  
196 km<sup>2</sup>. The vegetation around the lake is dominated by pine meadows with dwarf shrubs,  
197 rosette plants and alpine cushion (Schlutz and Lehmkuhl 2009, Yuan et al. 2014,  
198 Zhang and Mischke 2009). Mostly recharged by the glacial and snowpack melting  
199 water and regional precipitation, the lake is stratified with an epilimnion depth about  
200 4.4 m in the summer time. The lake is usually covered by ice in the winter time  
201 (Zhang and Mischke 2009). The superficial layer within the U-shaped valley is  
202 characterized by peat, clay and fluvial gravels with a depth about 1-3.5 m.  
203 Discontinuous and isolated permafrost is present at the slope of the valley above the

204 elevation of about 4150 m. The maximum frozen depth is about 1.5 m for the seasonal  
205 frozen ground around the lake. The seasonal frozen ground serves as an unconfined  
206 aquifer during the unfrozen months from July to October, and groundwater discharges  
207 into the epilimnion of the lake (Schlutz and Lehmkuhl 2009, Wang 1997, Zhang and  
208 Mischke 2009).

209

## 210 2.2 Sampling and field analysis

211 The field campaign to Ximen Co Lake was conducted from August, 2015, when it is  
212 warm enough to take the water samples of different origins as the studied site is  
213 seasonally frozen. A  $^{222}\text{Rn}$  continuous monitoring station was setup at the southeast  
214 part of the lake, which is fairly flat for setting up our tent and monitoring system.  
215 Surface water samples were collected around the lake, rivers at the upstream and  
216 downstream. Porewater samples were collected at one side of the lake as the other  
217 side is steep and rocky. The basic water quality parameters of conductivity (EC),  
218 dissolved oxygen (DO), TDS, ORP, pH in the water were recorded with the  
219 multi-parameter meter (HANNA, Co.). Relative humidity was recorded with a  
220 portable thermo-hydrometer (KTH-2, Co.). Lake water samples were taken with a  
221 peristaltic pump into 2.5 L glass bottles for  $^{222}\text{Rn}$  measurement with the Big Bottle  
222 system (DurrIDGE, Co.). Surface water samples were filtered with 0.45  $\mu\text{m}$  filters

223 (Advantec, Co.) in situ and taken into 5 ml, 15 ml, 15 ml and 50 ml Nalgene  
224 centrifugation tubes for stable isotope, major anion, cation and nutrient analysis.  
225 Porewater samples were taken from the lakes shore aquifers with a push point sampler  
226 (M.H.E, Co.) connected to peristaltic pump (Solinst, Co.) (Luo et al. 2014, Luo et al.  
227 2016). 100 ml raw surface water or porewater was titrated with 0.1  $\mu\text{M}$   $\text{H}_2\text{SO}_4$   
228 cartridge (Hach, Co.) in situ to measure total alkalinity (Hasler et al. 2016, Warner et  
229 al. 2013, White et al. 2016). Porewater was filtered with 0.45  $\mu\text{m}$  syringe filters  
230 (Advantec, Co.) in situ and taken into 5 ml, 15 ml, 15 ml and 50 ml Nalgene  
231 centrifugation tubes for stable isotope, major anion, cation and nutrient analysis. 250  
232 ml porewater was taken for  $^{222}\text{Rn}$  measurement with RAD7  $\text{H}_2\text{O}$  (DurrIDGE, Co.)  
233 Samples for major cation analysis were acidified with distilled  $\text{HNO}_3$  immediately  
234 after the sampling.

235  $^{222}\text{Rn}$  continuous monitoring station was set up at the northwest of the lake, close  
236 to the downstream of the lake (Figure 1b). Lake water (about 0.5 m) was pumped with  
237 a DC pump (12 V) driven by lithium batteries (100 Ah) and sprinkled into the  
238 chamber of RAD7 AQUA with a flow rate  $> 2 \text{ L min}^{-1}$ , where  $^{222}\text{Rn}$  in water vapor  
239 was equilibrated with the air  $^{222}\text{Rn}$ . The vapor in the chamber was delivered into two  
240 large dry units (Drierite, Co) to remove the moisture and circulated into RAD7  
241 monitor, where  $^{222}\text{Rn}$  activities were recorded every 5 mins. A temperature probe

Deleted: L

243 (HOBO<sup>®</sup>) was insert into the chamber to record the temperature of the water vapor.  
244 The monitoring was performed from 11: 31 am, Aug 22<sup>nd</sup> to 6: 30 am, Aug 24<sup>th</sup>, 2015.  
245 During the period of 1:50-4:30 pm on Aug 22<sup>nd</sup>, a sudden blizzard occurred, leading  
246 to an hourly precipitation about 0.6 mm to the lake area. Daily and hourly  
247 climatological data such as wind speed, air temperature and precipitation were  
248 retrieved from the nearest weather station in Jiuzhi town (N: 33.424614 °, E:  
249 101.485998). ~~Moreover, another RAD7 was placed at the lakeshore to measure <sup>222</sup>Rn~~  
250 ~~in the ambient air around the lake. Due to extremely low activities, the monitoring~~  
251 ~~period was conducted only for 4 hours, and the mean activity was adopted as the~~  
252 ~~background radon-222 activity to be used in the mass balance model.~~ Water level and  
253 temperature fluctuations were recorded with a conductivity-temperature-depth diver  
254 (Schlumberger, Co.) fixed at about 20 cm below the lake surface and calibrated with  
255 local atmospheric pressure recorded by a baro-diver (Schlumberger, Co.) above the  
256 lake. To correct for dissolved <sup>226</sup>Ra supported <sup>222</sup>Rn, one radium sample was extracted  
257 from 100 L lake water with MnO<sub>2</sub> fiber as described elsewhere (Luo et al. 2014,  
258 Moore 1976).

259

## 260 2.3 Chemical analysis

261 Major ions were measured with ICS-1100 (Dionex. Co.) in the Department of Earth

Deleted: monitor

Deleted: set

Formatted: Superscript

Deleted: s

Deleted: er

Deleted: when constructing

267 Sciences, the University of Hong Kong. The uncertainties of the measurements are  
268 less than 5 %. Nutrients, DIN and DIP were analyzed with flow injection analysis  
269 equipped with auto-sampler (Lachat. Co.) in the School of Biological Sciences, the  
270 University of Hong Kong. Stable  $^{18}\text{O}$  and  $^2\text{H}$  isotopes were measured with  
271 MOA-ICOS laser absorption spectrometer (Los Gatos Research (LGR) Triple Isotope  
272 Water Analyzer (TIWA-45EP)) at State Key Laboratory of Marine Geology, Tongji  
273 University, Shanghai. The stable isotopic standards and the recovery test has been  
274 fully described elsewhere (Luo et al., 2017). The measurement uncertainty is better  
275 than 0.1 % for  $^{18}\text{O}$  and 0.5 % for  $^2\text{H}$ .  $^{226}\text{Ra}$  was detected with RAD7 with the method  
276 described elsewhere (Kim et al. 2001, Lee et al. 2012, Luo et al. 2018).

277

#### 278 2.4 Radon transient model

279 Previous studies employed a steady state radon-222 mass balance model to  
280 quantify LGD to lentic system such as lakes and wetlands (Dimova and Burnett 2011,  
281 Luo et al. 2016). This model assumes that radon input derived from groundwater  
282 inflow, diffusion and river inflow are balanced by the radon losses of atmospheric  
283 evasion, decay and river outflow. However, recent studies revealed that the steady  
284 state is mainly reached after 2-15 days of constant metrological conditions, and  
285 mostly lentic system can be not be treated as steady state due to rapid radon-222

Deleted: ly

287 degassing to the atmosphere driven by wind-induced turbulence (Gilfedder et al.,  
288 2015; Dimova and Burnett, 2011).

289 Ximen Co lake is demonstrated to be highly stratified with an epilimnion of 4.4  
290 m (Zhang and Mischke 2009). The lake was formed by glacier erosion and the  
291 lakebed is characterized by granite bedrock with a thin sedimentary clay layer.  
292 Previous studies have indicated that sediment with a thickness of 0.7-3.3 m has been  
293 developed on the bedrock and forms the lake shore aquifer, which consists of clay,  
294 soils and gravels (Schlutz and Lehmkuhl 2009). Porewater sampled in the aquifer  
295 immediately behind the lake shore can well represent groundwater discharging into  
296 the lake, as suggested previously (Lewandowski et al. 2015, Rosenberry et al. 2015,  
297 Schafran and Driscoll 1993). LGD has been widely considered to occur within the  
298 first few meters of the lake shore (Lee et al. 1980, Rosenberry et al. 2015, Schafran  
299 and Driscoll 1993) and groundwater is considered to predominately discharge into the  
300 epilimnion since deep groundwater flow is highly limited by the Precambrian bedrock  
301 (Einarsdottir et al., 2016). Therefore,  $^{222}\text{Rn}$  mass balance model is established to  
302 quantify LGD to the epilimnion from the lake shore. Due to negligible hydrological  
303 connection between the epilimnion and hypolimnion, LGD for the lake can be  
304 quantified with  $^{222}\text{Rn}$  mass balance model for the epilimnion.

305 The governing equation of radon-222 transient mass balance model within a 1 x

306 1 x z cm (where z is the depth in cm) can be expressed as (Gilfedder et al. 2015):

307 
$$z \frac{\partial I_w}{\partial t} = F_{gw} + (I_{^{226}\text{Ra}} - I_w) \times z \times \lambda_{^{222}\text{Rn}} + F_{diff} - F_{atm} \quad (1)$$

308 where  $F_{gw}$ ,  $F_{diff}$ ,  $F_{atm}$  [ $\text{Bq m}^{-2} \text{d}^{-1}$ ] are  $^{222}\text{Rn}$  loadings from LGD, water-sediment

309 diffusion and water-air evasion, respectively;  $z$  [m] is the lake water level depth

310 recorded by the diver.  $\lambda_{^{222}\text{Rn}}$  is the decay constant of  $^{222}\text{Rn}$  with a value of  $0.186 \text{d}^{-1}$ .

311  $\lambda_{^{222}\text{Rn}} \times I_{^{226}\text{Ra}}$  and  $\lambda_{^{222}\text{Rn}} \times I_w$  account for the production and decay of  $^{222}\text{Rn}$  [ $\text{Bq m}^{-2} \text{d}^{-1}$ ]

312 in the water column, respectively.  $I_w$  and  $I_{^{226}\text{Ra}}$  [ $\text{Bq m}^{-2}$ ] represent  $^{222}\text{Rn}$  and  $^{226}\text{Ra}$

313 inventories in the epilimnion, and are expressed as:  $I_w = H \times C_w$  and

314  $I_{^{226}\text{Ra}} = H \times C_{^{226}\text{Ra}}$ , respectively; where  $H$  [m] is the depth of the epilimnion;  $C_w$  and

315  $C_{^{226}\text{Ra}}$  is the  $^{222}\text{Rn}$  and  $^{226}\text{Ra}$  activity [ $\text{Bq m}^{-3}$ ], respectively.

316 The model is valid under the following assumptions: 1) The epilimnion is well

317 mixed which is the actual condition for most natural boreal and high altitude glacial

318 lakes (Åberg et al. 2010, Zhang and Mischke 2009). 2)  $^{222}\text{Rn}$  input from riverine

319 water inflow, and loss from the lake water outflow and infiltration into the lake shore

320 aquifer is negligible compared to the groundwater borne  $^{222}\text{Rn}$ , because  $^{222}\text{Rn}$

321 concentration of groundwater is 2-3 orders of magnitude larger than that lake water

322 (Dimova and Burnett 2011, Dimova et al. 2013). Generally,  $^{222}\text{Rn}$  in the epilimnion is

323 sourced from LGD and decay input from parent isotope of  $^{226}\text{Ra}$  under secular

324 equilibrium, and is mainly lost via atmospheric evasion and radioactive decay.

325  $F_{atm}$  is the key sinking component of the transient model and is finally a function of  
326 wind speed and water temperature, both of which are temporal variant variables  
327 (Supplementary information). Lake water level  $z$  is also a temporal variant variable  
328 which represents the fluctuations of water volume of the epilimnion. This equation is  
329 discretized by the forward finite difference method, and the groundwater flux at each  
330 time step can be solved as follow

$$331 \quad [{}^{222}\text{Rn}_{t+\Delta t}] = \frac{[z \times {}^{222}\text{Rn}_t + [F_{diff} + F_{gw} - F_{atm} - {}^{222}\text{Rn}_t \times \lambda \times z] \times \Delta t]}{z} \quad (2)$$

332 where  ${}^{222}\text{Rn}_{t+\Delta t}$  and  ${}^{222}\text{Rn}_t$  [Bq m<sup>-3</sup>] is the <sup>222</sup>Rn activity at current time step and at  
333 the previous time steps, respectively, and  $\Delta t$  [min] is the time step which is set to be  
334 5 min in consistence with the <sup>222</sup>Rn record interval. With the inverse calculation based  
335 on Equation (2), the groundwater inflow at each time step can be obtained. However,  
336 large errors of the final LGD calculation will be induced by even a small amount of  
337 noise in the measured <sup>222</sup>Rn data due to the  ${}^{222}\text{Rn}_{t+\Delta t} - {}^{222}\text{Rn}_t$  term being with the  
338 measure uncertainty. To reduce the random errors of the measured <sup>222</sup>Rn  
339 concentrations, the time window with a width of 1 hour is proposed to smooth the  
340 curve (Supplementary information).

341

### 342 3. Results

#### 343 3.1 Time series data

344 Figure 2 shows the basic climatological parameters of the lake catchment during

Formatted: Superscript

Deleted: 4



346 the campaign month. There are discrete rainfall events occurring throughout the  
347 month with an average rainfall of  $3.1 \text{ mm d}^{-1}$ . The temperature throughout the month  
348 ranges from  $5.0 - 12.5 \text{ }^{\circ}\text{C}$  within an average of  $9.3 \text{ }^{\circ}\text{C}$ . The daily averaged wind speed  
349 generally ranges from  $0.7 - 2.5 \text{ m s}^{-1}$ , with an average of  $1.7 \text{ m s}^{-1}$ .  $^{222}\text{Rn}$  temporal  
350 distribution and other time series data are shown in Figure 3a and listed in  
351 Supplementary Table 1. Generally,  $^{222}\text{Rn}$  concentration varies from  $32.2$  to  $273 \text{ Bq m}^{-3}$ ,  
352 with an average of  $144.2 \pm 27.7 \text{ Bq m}^{-3}$ .  $^{222}\text{Rn}$  over the monitoring period shows  
353 typical diel cycle, much higher at nighttime and lower in the day time. Figures 3b-3d  
354 shows the time series data of temperature (5 mins interval), nearshore lake water level  
355 (1 min interval), and wind speed (1 hour interval). Temperature and lake water level  
356 also show typical diel cycles, but with antiphase fluctuations with each other.  
357 Temperature is higher during the daytime and lower at nighttime. However a sudden  
358 decrease of temperature was recorded due to the sudden blizzard (Figure 3b). Water  
359 level is higher at nighttime and lower during the daytime, with a strong fluctuation  
360 due to the turbulence caused by the blizzard (Figure 3c). The variability might reflect  
361 the dynamics of groundwater input and surface water inflow. The air temperature of  
362 the lake area is in phase with the water temperature. Wind speed is normally higher  
363 during the daytime and lower at nighttime (Figure 3d).

364 The variation of  $^{222}\text{Rn}$  is nearly in antiphase with the fluctuations of lake water

365 temperature and air temperature, indicating that the dominated controlling factors of  
366  $^{222}\text{Rn}$  fluctuations are water temperature and wind speed (Figure 3a). This  
367 phenomenon is reasonable as lake water  $^{222}\text{Rn}$  is predominately lost via atmospheric  
368 evasion, which is the function of wind speed and water temperature (Dimova et al.  
369 2015, Dimova and Burnett 2011, Dimova et al. 2013). High water temperature and  
370 wind speed leads to elevated atmospheric evasion and causes the decline of  $^{222}\text{Rn}$   
371 concentration in the lake water. However, there is a sudden reduction of radon activity  
372 from 2: 00 pm to 4: 00 pm on Jul 22<sup>nd</sup>, 2015, when the snow event led to a sudden  
373 decrease of water temperature, increase of wind speed, and large surface water  
374 turbulence as indicated by water level fluctuations (Figures 3a-3d).  $^{222}\text{Rn}$  in the  
375 porewater is 2-3 orders of magnitude larger than  $^{222}\text{Rn}$  in the lake water, suggesting  
376 that  $^{222}\text{Rn}$  is an ideal tracer to estimate the LGD (Supplementary Table 1).  $^{222}\text{Rn}$   
377 concentrations in surface water range from 22.2 to 209 Bq m<sup>-3</sup>, with an average of  
378 92.5 Bq m<sup>-3</sup> (n = 12), which is in the range of  $^{222}\text{Rn}$  continuous monitoring results,  
379 suggesting reliable  $^{222}\text{Rn}$  measurements (Supplementary Table 2).

380

### 381 3.2 Geochemical results

382 The results of major ions, nutrients and stable isotopes in different water end  
383 members are shown in Figures 4 and 5.  $\text{Cl}^-$  ranges from 0.6 to 2.1 mg L<sup>-1</sup> in the

384 surface water (including riverine inflow water, lake water and downstream water), 0.4  
385 to 2.7 mg L<sup>-1</sup> in porewater and has a much higher concentration of 5.9 mg L<sup>-1</sup> in  
386 rainfall water. Na<sup>+</sup> ranges from 1.6 to 3.4 mg L<sup>-1</sup> in the surface water, 1.2 to 4.4 mg  
387 L<sup>-1</sup> in porewater and has a concentration of 4.4 mg L<sup>-1</sup> in rainfall water. SO<sub>4</sub><sup>2-</sup> ranges  
388 from 1.2 to 2.3 mg L<sup>-1</sup> in the surface water, 0.4 to 1.7 mg L<sup>-1</sup> in porewater and has a  
389 significant low concentration of 0.01 mg L<sup>-1</sup> in rainfall water. Ca<sup>2+</sup> ranges from 3.0 to  
390 12.4 mg L<sup>-1</sup> in lake water, 3.4 to 12.5 mg L<sup>-1</sup> in porewater and has a significant high  
391 concentration of 20.5 mg L<sup>-1</sup> in rainfall water. Other concentrations of major ions are  
392 listed in Supplementary Table 2. As shown in Figure 4d and Supplementary Table 2,  
393 δ<sup>18</sup>O in the lake water ranges from - 13.06 ‰ to - 12.11 ‰, with an average of -  
394 12.41 ‰ (n = 7), and δ<sup>2</sup>H ranges from - 91.83 ‰ to - 87.47 ‰, with an average of -  
395 89.0 ‰ (n = 7). δ<sup>18</sup>O in the riverine inflow water ranges from - 13.44 ‰ to - 13.29 ‰,  
396 with an average of - 13.37 ‰ (n = 2), and δ<sup>2</sup>H ranges from - 93.25 ‰ to - 91.92 ‰,  
397 with an average of - 92.59 ‰ (n = 2). δ<sup>18</sup>O in the downstream water ranges from -  
398 12.51 ‰ to - 12.18 ‰, with an average of - 12.35 ‰ (n = 3), and δ<sup>2</sup>H ranges from -  
399 88.96 ‰ to - 87.1 ‰, with an average of - 87.98 ‰ (n = 3). δ<sup>18</sup>O in the porewater  
400 ranges from - 12.66 ‰ to - 11.52 ‰, with an average of - 11.97 ‰ (n = 8), and δ<sup>2</sup>H  
401 ranges from - 91.3 ‰ to -82.87 ‰, with an average of - 85.5 ‰ (n = 8). DIN in the  
402 surface water (including riverine inflow water, lake water and downstream water)

403 range from 6.6 to 16.9  $\mu\text{M}$ , with an average of 10.3  $\mu\text{M}$ , and DIP from 0.36 to 0.41  
404  $\mu\text{M}$ , with an average of 0.38  $\mu\text{M}$ . The concentrations of DIN for the porewater range  
405 from 0.7 to 358.8  $\mu\text{M}$ , with an average of 92.8  $\mu\text{M}$ , and DIP from 0.18 to 0.44  $\mu\text{M}$   
406 with an average of 0.31  $\mu\text{M}$  (Figure 5).

407

#### 408 **4. Discussion**

##### 409 4.1 Proglacial hydrologic processes and geochemical implications

410 Generally, major ion concentrations in the lake water and porewater of Ximen  
411 Co lake are significantly lower than those in main rivers, streams and other tectonic  
412 lakes in the QTP (Wang et al. 2010, Wang et al. 2016b, Yao et al. 2015), and are  
413 similar to those of snow and glaciers (Liu et al. 2011), suggesting that the lake water  
414 is mainly originated from glacier and snow melting. Ion concentrations in the lake and  
415 porewater of Ximen Co lake are much lower than those of rainfall collected in Jiuzhi  
416 town. This suggests that lake water is less influenced by precipitation (Figures 4a-4c).  
417 The concentrations of major ions in the porewater are high compared to the lake water,  
418 indicating weathering affects from the aquifer grains. The ratios of  $\text{Ca}^{2+}/\text{Na}^{+}$  in the  
419 porewater and groundwater is  $>1$ , also suggesting influences of weathering digenesis  
420 of major ions from the seasonal frozen ground at the lake shore aquifer (Wang et al.  
421 2010, Weynell et al. 2016, Yao et al. 2015).

422 The isotopic compositions of the lake water and porewater are significantly  
423 isotopic depleted, with values close to the compositions of glaciers and surface snow  
424 in the QTP, suggesting the lake is dominantly recharged from snow and glacier  
425 melting (Cui et al. 2014, Wang et al. 2016a, Zongxing et al. 2015). The relation of  
426  $\delta^{18}\text{O}$  versus  $\delta^2\text{H}$  for the lake water is  $\delta^2\text{H} = 4.25 \times \delta^{18}\text{O} - 35.99$ , with a slope much  
427 lower than that of the global meteoric water line (GMWL) (Figure 4d), suggesting the  
428 effects of lake surface evaporation. The relation of  $\delta^{18}\text{O}$  versus  $\delta^2\text{H}$  for the porewater  
429 is  $\delta^2\text{H} = 6.93 \times \delta^{18}\text{O} - 2.67$ , overall on GWML (Figure 4d). Deuterium excesses is  
430 defined as  $\Delta\text{D} = \delta\text{D} - 8 \times \delta^{18}\text{O}$  (Dansgaard 1964). The value of  $\Delta\text{D}$  is dependent on  
431 airmass origins, altitude effect and the kinetic effects during evaporation (Hren et al.  
432 2009). Global meteoric water has a  $\Delta\text{D}$  of + 10 ‰. In the QTP, glacier/snowpack  
433 melting water usually has large positive  $\Delta\text{D}$ , while the precipitations derived from  
434 warm and humid summer monsoon has lower  $\Delta\text{D}$  (Ren et al. 2017, Ren et al. 2013).  
435 In this study,  $\Delta\text{D}$  of surface water, lake and porewater ranges from + 8.5 to + 11.8 ‰,  
436 closed to the glacier melting water but much smaller than that of the local  
437 precipitation of + 18.8 ‰. This indicates the stream and lake water are mainly  
438 originated from glacial/snowpack melting rather than precipitation (Gat 1996, Lerman  
439 et al. 1995, Wang et al. 2016a). The slopes of  $\delta^2\text{H}$  versus  $\delta^{18}\text{O}$  in lake water and  
440 porewater are 4.25 and 6.93, both of which are lower than that of GMWL due to

Deleted: 37.1

Deleted: 41.2

Deleted: larger

Deleted: 29.72

Deleted:  $^{18}\text{O}$

446 surface evaporation. Lake water is more intensively influenced by evaporation  
447 compared to porewater. The plots of  $\delta^{18}\text{O}$  versus  $\text{Cl}^-$ , and  $\delta^2\text{H}$  versus  $\text{Cl}^-$  are well  
448 clustered for porewater end member (orange area), lake water end member (blue area),  
449 riverine inflow water end member (yellow area), and precipitation water (Figures 4e  
450 and 4f), suggesting stable  $\delta^{18}\text{O}$  and  $\delta^2\text{H}$  isotopes and  $\text{Cl}^-$  can serve as tracers to  
451 quantify the hydrologic partitioning of the lake by setting three endmember models.

452 The concentrations of DIN and DIP are all within the ranges of other glacial  
453 melting water and proglacial lake water (Hawkings et al. 2016, Hodson 2007, Hodson  
454 et al. 2005, Hudson et al. 2000, Tockner et al. 2002). Briefly, rainfall and upstream  
455 lake water such as YN-4 has the highest DIN concentration, indicating the glacier  
456 melting and precipitation could be important DIN sources in proglacial areas  
457 (Anderson et al. 2017, Dubnick et al. 2017). DIN in porewater is overall higher  
458 compared to the lake water, suggesting the porewater to be DIN effective source; and  
459 DIP concentrations is higher in the lake water compared to porewater, suggesting the  
460 porewater is a DIP sink (Figure 5). The N: P ratios in the lake water and porewater are  
461 averaged to be 27.1 and 320.5, respectively, both much larger than the Redfield Ratio  
462 (N: P = 16:1) in water and organism in most aquatic system and within the range of  
463 other proglacial lakes (Anderson et al. 2017). This also suggests that the lake water  
464 and porewater are under phosphate limited condition. N: P ratio in the rainfall water is

465 30.4, similar to the lake water. The average N: P ratio of porewater is much higher  
466 than that of lake water, indicating DIN enrichment in the lake shore aquifers (Figure 5).  
467 In pristine groundwater,  $\text{NO}_3^-$  is the predominated form of N and is highly mobile  
468 within the oxic aquifers, leading to much higher DIN concentrations in the porewater;  
469 DIP has high affinity to the aquifer grains, resulting in much lower DIP concentrations  
470 in the porewater (Lewandowski et al. 2015, Rosenberry et al. 2015, Slomp and Van  
471 Cappellen 2004). Thus, in analogous to surface runoff from glacier/snowpack melting,  
472 LGD can be also regarded as an important source for the proglacial lakes. Because of  
473 very high DIN and N: P ratios in the porewater, a relatively small portion of LGD  
474 delivers considerable nutrients into the glacial lake, shifting the aquatic N: P ratios  
475 and affecting the proglacial aquatic ecosystem (Anderson et al. 2017).

476

#### 477 4.2 Estimation of LGD

478 Figure 6a shows all the sinks and sources of radon with the epilimnion of the lake.  
479 Within  $^{222}\text{Rn}$  transient mass balance model, the dominant  $^{222}\text{Rn}$  loss is atmospheric  
480 degassing/evasion. Generally,  $^{222}\text{Rn}$  degassing rate is the function of the radon-222  
481 concentration gradient at the water-air interface and the parameter of gas piston  
482 velocity  $k$ , which is finally the function of wind speed and water temperature (Dimova  
483 and Burnett 2011, Gilfedder et al. 2015). To evaluate  $^{222}\text{Rn}$  evasion rate, this study

484 employs the widely used method proposed by MacIntyre et al. (1995) which is also  
485 detailed described in Supplementary Information. Based on the field data of  $^{222}\text{Rn}$   
486 concentration in the lake water, wind speed and temperature log, the radon degassing  
487 rate is calculated in a range of 0.8 to 265.2  $\text{Bq m}^2 \text{d}^{-1}$ , with an average 42.0 of  $\text{Bq m}^2$   
488  $\text{d}^{-1}$ .

489 In addition to the atmospheric loss and sedimentary diffusion inputs,  $^{222}\text{Rn}$  is also  
490 sinked via radioactive decay, and sourced from decay of parent isotope of  $^{226}\text{Ra}$ . The  
491 decay loss of  $^{222}\text{Rn}$  fluctuates in phase with the distribution of  $^{222}\text{Rn}$  concentration  
492 monitored by RAD 7 AQUA. The equations to estimate benthic fluxes are shown in  
493 supplementary information. The decay loss is calculated to be 26.4 to 223.4  $\text{Bq m}^{-2} \text{d}^{-1}$ ,  
494 with an average of  $118.0 \pm 22.7 \text{Bq m}^{-2} \text{d}^{-1}$ .  $^{226}\text{Ra}$  concentration is  $0.01 \text{Bq m}^{-3}$  for the  
495 lake water. Under secular equilibrium, the  $^{226}\text{Ra}$  decay input can be calculated by  
496 multiplying  $^{226}\text{Ra}$  concentration in the lake water with  $\lambda_{222}$  (Corbett et al. 1997, Kluge  
497 et al. 2007, Luo et al. 2016).  $^{226}\text{Ra}$  decay input is calculated to be  $0.83 \text{Bq m}^{-2} \text{d}^{-1}$ ,  
498 which is significantly low compared to other  $^{222}\text{Rn}$  sources to the epilimnion.

499 With the obtained sinks and sources of  $^{222}\text{Rn}$  in the lake, and the constants given in  
500 Table 1, LGD rate can be obtained by dividing the groundwater derived  $^{222}\text{Rn}$  with its  
501 concentration in groundwater endmember. The obtained LGD rate, ranges from -23.7  
502  $\text{mm d}^{-1}$  to  $90.0 \text{mm d}^{-1}$ , with an average of  $10.3 \pm 8.2 \text{mm d}^{-1}$  (Figure 7) The LGD rate



503 range is relatively less than the daily lake water level variations ( $\approx 50$  mm), indicating  
504 that the lake water level variation could be a combined effect of surface runoff and  
505 LGD (Hood et al. 2006). The negative values of LGD rate reflect the return  
506 groundwater flow due to infiltration into the porewater. Normally, the dominant  
507 values are positive, indicating LGD rate is significant compared to water infiltrations  
508 into lakeshore aquifer. The temporal variation of LGD rate could be attributed to the  
509 fluctuations of the hydraulic gradient in the proglacial areas (Hood et al. 2006, Levy  
510 et al. 2015). As indicated by  $\Delta D$  (mostly  $> 10$ ) of surface water, the lake and the  
511 upstream water is considered to be mainly recharged from glacial/snowpack melting  
512 rather other precipitations.

513 To assess the magnitude of uncertainty of  $^{222}\text{Rn}$  transient model, the sensitivity of  
514 estimated LGD to changes in other variables is examined. A sensitivity coefficient  $f$  is  
515 proposed to evaluate this uncertainty according to Langston et al. (2013)

$$516 \quad f = (\Delta F_{LGD} / F_{LGD}) / (\Delta y_i / y_i) \quad (3)$$

517 where  $\Delta F_{LGD}$  is the amount of change in  $F_{LGD}$  from the original value.  $\Delta y_i$  is the  
518 amount of change in the other variable of  $y_i$  from the original value. Thus, higher  $f$   
519 indicates a large uncertainty of final LGD estimate. The uncertainty mainly stems  
520 from  $^{222}\text{Rn}$  measurements in different water endmembers, the atmospheric loss and  
521 water level record. The uncertainties of  $^{222}\text{Rn}$  measurement are about 10 % and 15-20

522 % in groundwater and lake water endmember, respectively. The uncertainty of  
523 atmospheric loss is derived from uncertainty of  $^{222}\text{Rn}$  in lake water (with an  
524 uncertainty of 15-20 %), temperature (with an uncertainty  $\approx 5$  %) and wind speed  
525 (with an uncertainty  $\approx 5$  %). Thus, the final LGD estimate has an uncertainty of  
526 35-40 %.

527

### 528 **4.3 Hydrologic partitioning**

529 Compared to the groundwater labeled radionuclide of  $^{222}\text{Rn}$ , stable  $^{18}\text{O}/^2\text{H}$   
530 isotopes are advantageous in the investigation of evaporation processes due to their  
531 fractionations from water to vapor and have been widely used to investigate the  
532 hydrologic cycle of lakes in various environments (Gat 1995, Gibson et al. 1993,  
533 Gonfiantini 1986, Stets et al. 2010). With the field data of stable isotopic composition  
534 and  $\text{Cl}^-$  concentrations in different water end members, groundwater input, surface  
535 water input, lake water outflow and infiltration, and evaporation can be partitioned by  
536 coupling stable isotopic mass balance model with  $\text{Cl}^-$  mass balance model (Figure 6b).

537 The model, consisting of the budgets of stable isotopes and  $\text{Cl}^-$ , and water masses  
538 for the epilimnion, is used to quantify riverine inflow, lake water outflow and  
539 infiltration, and evaporation (Gibson et al. 2016, LaBaugh et al. 1995, LaBaugh et al.  
540 1997). The model is valid under the following assumptions: (1) constant density of

541 water; (2) no long-term storage change in the reservoir; (3) well-mixed for the  
 542 epilimnion (Gibson 2002, Gibson et al. 2016, Gibson and Edwards 2002, LaBaugh et  
 543 al. 1997). The above assumptions are reasonably tenable during the short monitoring  
 544 period. The model can be fully expressed as

$$545 \quad F_{in} + F_{LGD} + F_p = F_E + F_{out} \quad (4)$$

$$546 \quad F_{in} \times \delta_{in} + F_{LGD} \times \delta_{gw} + F_p \times \delta_p = F_E \times \delta_E + F_{out} \times \delta_L \quad (5)$$

$$547 \quad F_{in} \times [Cl^-]_{in} + F_{LGD} \times [Cl^-]_{gw} + F_p \times [Cl^-]_p = F_E \times [Cl^-]_L + F_{out} \times [Cl^-]_L \quad (6)$$

548 where  $F_{in}$  [mm d<sup>-1</sup>] is the surface water inflow to the lake;  $F_{gw}$  [mm d<sup>-1</sup>] is LGD rate.  
 549  $F_p$  [mm d<sup>-1</sup>] is the mean daily rainfall rate during the sampling period.  $F_E$  [mm d<sup>-1</sup>] is  
 550 the lake evaporation.  $F_{out}$  [mm d<sup>-1</sup>] is the lake water outflow via runoff and  
 551 infiltration into the lake shore aquifer.  $\delta_{in}$ ,  $\delta_{gw}$ ,  $\delta_E$  and  $\delta_p$  are the isotopic compositions  
 552 of surface water inflow, LGD, and evaporative flux, respectively. The values of  $\delta_{in}$ ,  
 553  $\delta_{gw}$ , and  $\delta_p$  are obtained from field data and the composition of  $\delta_E$  are calculated as  
 554 shown in supplementary information.  $[Cl^-]_{in}$ ,  $[Cl^-]_{gw}$ ,  $[Cl^-]_L$  and  $[Cl^-]_p$  are the  
 555 chloride concentrations in the inflow water, porewater, lake water and precipitation,  
 556 respectively.

557 The components of the mass balance model can be obtained from the field data of  
 558 isotopic composition and Cl<sup>-</sup> concentrations in different water endmembers. The  
 559 average <sup>18</sup>O composition -13.37 ‰ of riverine inflow water is taken as the value of

560 the input parameter  $\delta_{in}$ ,  $\delta^{18}\text{O}$  and  $\delta^2\text{H}$  in the groundwater endmember and lake water  
561 end member are calculated to be -12.41 ‰ and -87.18 ‰, respectively.  $\delta^{18}\text{O}$  and  $\delta^2\text{H}$   
562 in the rainfall are measured to be -5.47 ‰ and -24.98 ‰, respectively. With the  
563 measured values of  $\delta_L$ ,  $h$ ,  $\delta_{in}$ , and the estimated  $\varepsilon$  and  $\delta_a$ , the isotopic composition  
564 of  $\delta_E$  is calculated to be -35.11 ‰, which is in line with the results of alpine and  
565 arctic lakes elsewhere (Gibson 2002, Gibson et al. 2016, Gibson and Edwards 2002).  
566 The values of  $[\text{Cl}^-]_{in}$ ,  $[\text{Cl}^-]_{gw}$ , and  $[\text{Cl}^-]_L$  are calculated to be 0.91 mg L<sup>-1</sup>, 1.48  
567 mg L<sup>-1</sup> and 1.02 mg L<sup>-1</sup>, respectively. All the parameters used in the model are shown  
568 in Table 2.

569 According to Equations 4-6, the uncertainties of calculations of  $F_{in}$ ,  $F_{out}$  and  $E$  are  
570 mainly derived from the uncertainty of  $F_{LGD}$  and the compositions of Cl<sup>-</sup>,  $\delta\text{D}$  and  $\delta^{18}\text{O}$   
571 in different water endmembers as suggested in previous studies (Genereux 1998,  
572 Klaus and McDonnell 2013). The compositions of Cl<sup>-</sup>,  $\delta\text{D}$  and  $\delta^{18}\text{O}$  in surface water,  
573 groundwater endmembers have an uncertainty of 5 %. The uncertainty of  $\delta_E$  is  
574 reasonably assumed to be  $\approx 20$  %. Thus, considering the uncertainty propagation of  
575 all the above parameters, the uncertainties of  $F_{in}$ ,  $F_{out}$  and  $E$  would be scaled up to  
576 70-80 % of the final estimates.

577

578 4.4 The hydrologic partitioning of the glacial lake

579 Based on the three endmember model of  $^{18}\text{O}$  and  $\text{Cl}^-$ , the riverine inflow rate was  
580 calculated to be  $135.6 \pm 119.0 \text{ mm d}^{-1}$ , and the lake outflow rate is estimated to be  
581  $141.5 \pm 132.4 \text{ mm d}^{-1}$ ; the evaporation rate is calculated to be  $5.2 \pm 4.7 \text{ mm d}^{-1}$ . The  
582 summary of the hydrologic partitioning of the lake is shown in Figure 8a. Generally,  
583 the proglacial lake is mostly recharged by the riverine inflow from the snowpack or  
584 the glacier melting. The groundwater discharge contributes about only 7.0 % of the  
585 total water input to the lake, indicating groundwater input does not dominate water  
586 input to the proglacial lake. The recent review on LGD rate by Rosenberry et al.  
587 (2015) suggests that the median of LGD rate in the literatures is  $7.4 \text{ mm d}^{-1}$  ( $0.05 \text{ mm}$   
588  $\text{d}^{-1}$  to  $133 \text{ mm d}^{-1}$ ), which is about 2/3 of LGD rate in this study. This difference may  
589 be due to the hydrogeological setting of the lake shore aquifer. This aquifer is formed  
590 by grey loam, clayey soil and sand (Lehmkuhl 1998, Schlutz and Lehmkuhl 2009),  
591 which is with relatively high permeability. Previous studies have indicated that  
592 groundwater forms a key component of proglacial hydrology (Levy et al. 2015).  
593 However, there have been limited quantitative studies of groundwater contribution to  
594 hydrologic budget of proglacial areas. This study further summarizes the groundwater  
595 discharge studies over the glacial forefield areas. Based on long term hydrological and  
596 climatological parameter monitoring on the Nam Co lake in the QTP, Zhou et al.  
597 (2013) estimated the LGD to be 5-8 mm d<sup>-1</sup>, which is comparable to the surface

**Deleted:** The lake water is mainly lost v  
surface water outflow and infiltration to  
lake shore aquifers. The evaporation  
constitutes relatively small ratio ( $\approx 3.5$   
of total water losses. The annual  
evaporation rate was recorded to be 142  
mm (equivalent to  $3.92 \text{ mm d}^{-1}$ ) in 2015  
the Jiuzhi weather station, lower than the  
obtained evaporation in this study. This  
may be due to much higher evaporation  
August during the monitoring period.

**Formatted:** Font color: Red

**Formatted:** Font color: Red

**Deleted:** Brown et al. (2006), (Zhou et  
2013)

**Formatted:** Superscript

611 | runoff input and LGD of this study. Brown et al. (2006) investigated the headwater  
612 streams at the proglacial areas of Taillon Glacier in French and found that  
613 groundwater contributes 6-10 % of the stream water immediate downwards of the  
614 glacier. Using water mass balance model, Hood et al. (2006) shows that groundwater  
615 inflow is substantial in the hydrologic partitioning of the proglacial Lake O'Hara in  
616 front of Opabin Glacier in Canada and comprised of 30 -74 % of the total inflow. Roy  
617 and Hayashi (2008) studied the proglacial lakes of Hungabee lake and Opabin lake at  
618 glacier forefield of Opabin Glacier and found that groundwater component is  
619 predominant water sources of the lakes and consisted of 35-39 % of the total water  
620 input of the lakes. Langston et al. (2013) further investigated a tarn immediate in front  
621 of Opabin Glacier and indicated the tarn is predominantly controlled by groundwater  
622 inflow/outflow, which consisted of 50-100 % of total tarn volume. Magnusson et al.  
623 (2014) studied the streams in the glacier forefield of Dammagletscher, Switzerland  
624 and revealed that groundwater contributed only 1-8 % of the total surface runoff.  
625 Groundwater contribution in this study is similar to those obtained the mountainous  
626 proglacial areas in Europe, but much lower than those obtained in the proglacial areas  
627 of polar regions. It is concluded that proglacial lakes/streams in front of mountainous  
628 glaciers are mainly recharged by surface runoff from glacier/snowpack melting. This  
629 might be due to well-developed stream networks and limited deep groundwater flow

630 (Brown et al. 2006, Einarsdottir et al. 2017, Magnusson et al. 2014). However,  
631 proglacial tarns and lakes in the polar areas are predominantly controlled by  
632 groundwater discharge, due to less connectivity of surface runoff and high shallow  
633 and deep groundwater connectivity (Hood et al. 2006, Langston et al. 2013, Roy and  
634 Hayashi 2008).

635 The evaporation constitutes relatively small ratio ( $\approx 3.5\%$ ) of total water losses. The  
636 annual evaporation rate was recorded to be 1429.8 mm (equivalent to  $3.92\text{ mm d}^{-1}$ ) in  
637 2015 by the Jiuzhi weather station, lower than the obtained evaporation in this study.

638 This may be due to much higher evaporation in August during the monitoring period.

639 The estimation of evaporation in this study generally represents the upper limit of the  
640 lake, as the sampling campaign was conducted during the summer time when the

641 highest evaporation might occur. The lake surface evaporation derived from the pan

642 evaporation in the QTP ranges from  $\sim 700\text{ mm yr}^{-1}$  in the eastern QTP to over 1400

643 mm  $\text{yr}^{-1}$  in the interior lakes of the QTP (Ma et al. 2015, Yang et al. 2014, Zhang et al.

644 2007). The evaporation of this study is rather in line with the previous evaporation

645 observation in the eastern QTP, stressing the tenability of evaporation in this study.

646 The runoff input is predominated recharge component ( $> 90\%$ ) compared to other

647 components, with an area normalized value comparable to previous studies of runoff

648 input in other glacial melting dominant lakes in the QTP (Biskop et al. 2016, Zhang et

**Deleted:** The lake water is mainly lost v  
surface water outflow and infiltration to  
lake shore aquifers.

**Formatted:** Indent: First line: 0 ch

**Deleted:** ese studies

**Deleted:** s

**Deleted:** Eastern QTP

**Deleted:** is

**Deleted:** over

**Deleted:**  $\approx$

**Formatted:** Superscript

**Formatted:** Superscript

**Deleted:** e

659 al. 2011, Zhou et al. 2013). The runoff input and the lake evaporation of the study  
660 area, however, are subject to highly daily, seasonal and inter-annual variability as  
661 indicated by previous studies in the QTP (Lazhu et al. 2016, Lei et al. 2017, Ma et al.  
662 2015, Zhou et al. 2013). Therefore, further investigations of long term and high  
663 resolution climatological and isotopic data are required to provide precise constraints  
664 of hydrologic partitioning of the lakes in the QTP.  
665 4.5 LGD derived nutrient loadings, nutrient budget and ecological implications

Deleted: es

Deleted: (Ma et al. 2015, Zhang et al. 2007)(Zhang et al. 2013)

Formatted: Font color: Red

Deleted: .

666 Compared to extensive studies of SGD derived nutrient loadings in the past decade  
667 (Luo and Jiao 2016, Slomp and Van Cappellen 2004), studies of LGD derived nutrient  
668 loadings have received limited attention, even given the fact that groundwater in lake  
669 shore aquifers is usually concentrated in nutrients (Lewandowski et al. 2015,  
670 Rosenberry et al. 2015). Even fewer studies focus on chemical budgets in the  
671 proglacial lakes which are often difficult to access for sampling. Groundwater borne  
672 DIN and DIP across the sediment-water interface in this study are determined with an  
673 equation coupling the advective or LGD-derived, and diffusive solute transport  
674 (Hagerthey and Kerfoot 1998, Lerman et al. 1995)

675 
$$F_j = -nD_j^m \frac{dC_j}{dx} + v_{gw} C_j \quad (7)$$

676 where  $-nD_j^m \frac{dC_j}{dx}$  is the diffusion input and  $v_{gw} C_j$  is the LGD derived fluxes,  $F_j$



681  $[\mu\text{M m}^{-2} \text{ d}^{-1}]$  is the mol flux of nutrient species  $j$  (representing DIN or DIP).  $n$  is the  
682 sediment porosity.  $D_j^m$  is the molecular diffusion coefficient of nutrient species  $j$ ,  
683 which is given to be  $4.8 \times 10^{-5} \text{ m}^2 \text{ d}^{-1}$  for DIP (Quigley and Robbins 1986), and  $8.8 \times$   
684  $10^{-5} \text{ m}^2 \text{ d}^{-1}$  for DIN (Li and Gregory 1974), respectively.  $C_j [\mu\text{M}]$  is the concentration  
685 of nutrient species  $j$ .  $x[\text{m}]$  is the sampling depth.  $v_{gw}$  is LGD rate estimated by <sup>222</sup>Rn  
686 mass balance model and has a value of  $10.3 \pm 8.2 \text{ mm d}^{-1}$ .  $\frac{dC_j}{dx}$  is the concentration  
687 gradient of nutrient species  $j$  across the water-sedimentary interface.

688 Substituting the constants and the field data of DIN and DIP in to Equation 6, LGD  
689 derived nutrient loadings are calculated to be  $954.3 \mu\text{mol m}^{-2} \text{ d}^{-1}$  and  $3.2 \mu\text{mol m}^{-2} \text{ d}^{-1}$   
690 for DIN and DIP, respectively. Riverine inflow brings  $1195.0 \mu\text{mol m}^{-2} \text{ d}^{-1}$  DIN,  $52.9$   
691  $\mu\text{mol m}^{-2} \text{ d}^{-1}$  DIP into the lake. Lake water outflow derived nutrient loss is estimated  
692 to be  $1439.9 \mu\text{mol m}^{-2} \text{ d}^{-1}$  and  $54.7 \mu\text{mol m}^{-2} \text{ d}^{-1}$  for DIN and DIP, respectively.  
693 Nutrients in the lake can be also sourced from atmospheric deposit (mostly in form of  
694 precipitation). With the nutrient concentrations in the rain water during the monitoring  
695 period, the wet deposit is calculated to be  $76 \mu\text{mol m}^{-2} \text{ d}^{-1}$  and  $2.5 \mu\text{mol m}^{-2} \text{ d}^{-1}$ , for  
696 DIN and DIP, respectively. The loadings of DIN to the lakes are mainly from surface  
697 runoff and LGD, which comprised of 42.9 % and 53.7 % of the total DIN loadings.  
698 Groundwater derived DIP input, however, constitutes only 6.3 % of the total DIP  
699 inputs to the lake, indicating groundwater borne DIP is less contributive to the

Deleted: ..

701 nutrient budget of the lake compared to DIN. Very recent studies on polar regions  
702 have indicated that the glacier/snowpack water is the main N sources to the proglacial  
703 lakes (Anderson et al. 2013, Dubnick et al. 2017). However, they do not consider the  
704 contribution of groundwater borne N, in spite of the high groundwater connectivity in  
705 the proglacial areas (Roy and Hayashi 2008). This study stresses that groundwater  
706 borne DIN could be comparable to the surface runoff derived DIN.

707 Based on nutrient results, the lake is considered to be an oligotrophic lake, similar  
708 to other glacier melting dominant lakes in the QTP (Liu et al. 2011, Mitamura et al.  
709 2003). Phytoplankton is good dissolved organic phosphate (DOP) recyclers and will  
710 overcome inorganic P limitation though DOP cycling in most template lakes (Hudson  
711 et al. 2000). However, this may be not applicable for the glacial melting water and the  
712 peri/pro-glacial lake water. Previous studies show that phosphate nutrients are  
713 dominated by DIP and particulate phosphate, and the DOP contributes less than 10 %  
714 of the dissolved phosphate (Cole et al. 1998, Hawkins et al. 2016, Hodson 2007).  
715 Thus DOP recycling is not likely to low N: P ratio under these conditions. Thus, the  
716 primary production (PP) is therefore considered to be controlled by the DIP loadings.  
717 The sum of DIN and DIP inputs minus the calculated DIN and DIP outputs leads to  
718 surpluses of 785.4  $\mu\text{mol m}^{-2} \text{d}^{-1}$  and 3.9  $\mu\text{mol m}^{-2} \text{d}^{-1}$  for DIN and DIP, respectively.  
719 The surpluses are expected to be consumed by the phytoplankton and converted into

**Deleted:** elsewhere

**Deleted:** and under phosphate limited condition

**Moved down [1]:** Thus, the primary production (PP) is therefore considered to be controlled by the DIP loadings. The surplus of DIN and DIP inputs minus the sum of calculated DIN and DIP outputs leads to surpluses of 785.4  $\mu\text{mol m}^{-2} \text{d}^{-1}$  and 3.9  $\mu\text{mol m}^{-2} \text{d}^{-1}$  for DIN and DIP, respectively

**Deleted:** d

**Field Code Changed**

**Deleted:** ?

**Deleted:** ?

**Deleted:** is?

**Field Code Changed**

**Deleted:** are

**Deleted:** er

**Deleted:** The surpluses are expected to be consumed by the phytoplankton and converted into the PP under the Red Field ratio (C: N: P = 106: 16: 1), leading to a surplus of 0.41  $\text{mmol C m}^{-2} \text{d}^{-1}$ .

**Moved (insertion) [1]**

**Deleted:** ?

**Deleted:** difference between the

**Deleted:** sum of

**Deleted:** and

**Deleted:** minus

**Deleted:** sum of the

747 the PP under phosphate limited conditions. As primary producers in the fresh  
748 lacustrine system consume the nutrient under variant N: P ratios (7.1 to 44.2, mean:  
749 22.9) (Downing and McCauley 1992), the biological uptake of DIN is roughly  
750 estimated to be  $89.3 \mu M m^2 d^{-1}$ . Therefore, the nutrient budgets for DIN and DIP  
751 can be finally conceptualized in Figures 8b and 8c. ▾

#### 752 4.6. Implications, prospective and limitations

753 Mountainous proglacial lakes are readily developed in glacier forefields of QTP and  
754 other high mountainous glacial such as Europe Alps and Pamir at central Asian  
755 (Heckmann et al. 2016). The proglacial lakes are always trapping system of sediment  
756 and sinks for water and chemical originated from glacier/snowpack melting and  
757 groundwater. In analogous to cosmogenic isotopes such as  $^{10}Be$  serving as a tool to  
758 quantify the sediment sources, approaches integrating  $^{222}Rn$  and stable isotopes  
759 provides both qualitatively and quantitatively evaluations of groundwater  
760 contributions and hydrologic partitioning in these remote and untapped lacustrine  
761 systems. Thus, it is expected that the multiple aqueous isotopes is considered to be  
762 effective tools to investigate the LGD and hydrologic partitioning in other proglacial  
763 lakes. This study is mainly limited by the relatively short sampling and monitoring  
764 period. As a special hydrologic regime, the lake shore aquifers of the proglacial lakes  
765 are experiencing frozen-unfrozen transition seasonally, and the dominant recharge of

Field Code Changed

Formatted: Superscript

Deleted: The

Formatted: Font: Times New Roman

Formatted: Superscript

Deleted: are

Deleted: as summarized

Deleted: The estimated primary productivity is lower than most temperate eutrophicated and oligotrophic lakes (Cetler et al. 1998, Smith 1979), and comparable to some high latitude or altitude lakes (Richerson et al. 1986, Sterner 2010).

775 glacial melting could be fluctuated significantly due to air temperature variation.  
776 Therefore, future groundwater and hydrological studies can be extended to longtime  
777 sampling and monitoring of stable isotopes and  $^{222}\text{Rn}$  in different water endmembers  
778 to reveal the seasonally hydrological and hydrogeological dynamics and their impacts  
779 on local biogeochemical cycles and ecological systems. Special concerns would be  
780 placed on how surface/groundwater interactions and the associated biogeochemical  
781 processes in response to the seasonal frozen ground variations and glacier/snowpack  
782 melting intensity.

Deleted: .

783

## 784 **5. Conclusion**

Deleted:

785 A  $^{222}\text{Rn}$  continuous monitoring is conducted at Ximen Co Lake, a proglacial lake  
786 located at the east QTP. A dynamic  $^{222}\text{Rn}$  mass balance model constrained by radium  
787 mass balance and water level fluctuation is used to quantify temporal distribution of  
788 LGD of the lake. The obtained LGD over the monitoring time ranges from  $-23.7$   
789  $\text{mm d}^{-1}$  to  $80.9 \text{ mm d}^{-1}$ , with an average of  $10.3 \pm 8.2 \text{ mm d}^{-1}$ . Thereafter, a three  
790 endmember model consisting of the budgets of water, stable isotopes and  $\text{Cl}^-$  is used  
791 to depict the hydrologic partitioning of the lake. Riverine inflow, lake water outflow  
792 via surface runoff, and surface evaporation are estimated to be  $135.6 \text{ mm d}^{-1}$ ,  $141.5$   
793  $\text{mm d}^{-1}$  and  $5.2 \text{ mm d}^{-1}$ , respectively. LGD derived nutrient loading is estimated to be

**Deleted:** Upon depicting nutrient budget within the lake, the primary productivity estimated to be  $0.41 \text{ mol C m}^{-2} \text{ d}^{-1}$ .

796 785.4  $\mu\text{mol m}^{-2} \text{ d}^{-1}$  and 3.2  $\mu\text{mol m}^{-2} \text{ d}^{-1}$  for DIN and DIP, respectively. This study also  
797 implicates that LGD constitutes relatively small portion of the proglacial hydrologic  
798 partitioning, however, delivers nearly a half of the nutrient loadings to the proglacial  
799 lake.

800 This study presents the first attempt to quantify LGD and the associated nutrient  
801 loadings to the proglacial lake of QTP. To our knowledge, there is almost no study on  
802 the groundwater-lake water interaction in the high altitude proglacial lakes in QTP.

803 This study demonstrates that  $^{222}\text{Rn}$  based approach can be used to investigate the  
804 groundwater dynamics in the high altitude proglacial lakes. The method is

805 instructional to similar studies in other proglacial lakes in the QTP and elsewhere. For

806 a comprehensive understanding the hydrological and biogeochemical dynamics in the

807 QTP, interdisciplinary and multi-approach integrated studies are in great need. Of

808 particular importance are the lake hydrology and groundwater surface water

809 interaction studies based on multiple approaches such as remote sensing products,

810 long term and high resolution observation of climatological parameters and isotopic

811 data.

812 ▼

**Deleted:** international,

**Deleted:** ,

**Deleted:** ,

**Deleted:** based constraining and numerical modeling

**Deleted:** .

### 813 Acknowledgements

814 This study was supported by grants from the National Natural Science Foundation of

824 China (NSFC, No.41572208) and (NSFC, 91747204), and the Research Grants  
825 Council of Hong Kong Special Administrative Region, China (HKU17304815). The  
826 authors thank Mr. Buming Jiang for his kind help in the field works during the  
827 campaign and Ergang Lian for his help in stable isotope analysis. The authors thank  
828 Jessie Lai for her help in FIA analysis in School of Biological Sciences, HKU.  
829 Supporting data are included as in the files of supplementary information 2 and 3;  
830 Climatological data are purchased through <http://www.weatherdt.com/shop.html>; any  
831 additional data may be obtained from L.X. (email: xinluo@hku.hk);

832

### 833 **References**

- 834 Åberg, J., Jansson, M. and Jonsson, A. (2010) Importance of water temperature and  
835 thermal stratification dynamics for temporal variation of surface water CO<sub>2</sub> in a  
836 boreal lake. *Journal of Geophysical Research: Biogeosciences* (2005–2012) 115(G2).  
837 Andermann, C., Longuevergne, L., Bonnet, S., Crave, A., Davy, P. and Gloaguen, R.  
838 (2012) Impact of transient groundwater storage on the discharge of Himalayan rivers.  
839 *Nature Geoscience* 5(2), 127-132.
- 840 Anderson, L., Birks, J., Rover, J. and Guldager, N. (2013) Controls on recent Alaskan  
841 lake changes identified from water isotopes and remote sensing. *Geophysical*  
842 *Research Letters* 40(13), 3413-3418.
- 843 Anderson, N.J., Saros, J.E., Bullard, J.E., Cahoon, S.M., McGowan, S., Bagshaw, E.A.,  
844 Barry, C.D., Bindler, R., Burpee, B.T. and Carrivick, J.L. (2017) The Arctic in the  
845 Twenty-First Century: Changing Biogeochemical Linkages across a Paraglacial  
846 Landscape of Greenland. *BioScience* 67(2), 118-133.
- 847 Barry, R.G. (2006) The status of research on glaciers and global glacier recession: a  
848 review. *Progress in Physical Geography* 30(3), 285-306.
- 849 Batlle-Aguilar, J., Harrington, G.A., Leblanc, M., Welch, C. and Cook, P.G. (2014)  
850 Chemistry of groundwater discharge inferred from longitudinal river sampling. *Water*  
851 *Resources Research* 50(2), 1550-1568.

852 Belanger, T.V., Mikutel, D.F. and Churchill, P.A. (1985) Groundwater seepage nutrient  
853 loading in a Florida Lake. *Water Research* 19(6), 773-781.

854 Biskop, S., Maussion, F., Krause, P. and Fink, M. (2016) Differences in the  
855 water-balance components of four lakes in the southern-central Tibetan Plateau.  
856 *Hydrology and Earth System Sciences* 20(1), 209.

857 Blume, T., Krause, S., Meinikmann, K. and Lewandowski, J. (2013) Upscaling lacustrine  
858 groundwater discharge rates by fiber-optic distributed temperature sensing. *Water*  
859 *Resources Research* 49(12), 7929-7944.

860 Böhner, J. (1996) Säkulare Klimaschwankungen und rezente Klimatrends Zentral-und  
861 Hochasiens, Goltze.

862 Böhner, J. (2006) General climatic controls and topoclimatic variations in Central and  
863 High Asia. *Boreas* 35(2), 279-295.

864 Bolch, T., Kulkarni, A., Kääb, A., Huggel, C., Paul, F., Cogley, J.G., Frey, H., Kargel, J.S.,  
865 Fujita, K., Scheel, M., Bajracharya, S. and Stoffel, M. (2012) The State and Fate of  
866 Himalayan Glaciers. *Science* 336(6079), 310-314.

867 Brown, L.E., Hannah, D.M., Milner, A.M., Soulsby, C., Hodson, A.J. and Brewer, M.J.  
868 (2006) Water source dynamics in a glacierized alpine river basin (Taillon-Gabiétous,  
869 French Pyrénées). *Water Resources Research* 42(8).

870 Burnett, W.C., Peterson, R.N., Santos, I.R. and Hicks, R.W. (2010) Use of automated  
871 radon measurements for rapid assessment of groundwater flow into Florida streams.  
872 *Journal of Hydrology* 380(3), 298-304.

873 Callegary, J.B., Kikuchi, C.P., Koch, J.C., Lilly, M.R. and Leake, S.A. (2013) Review:  
874 Groundwater in Alaska (USA). *Hydrogeology Journal* 21(1), 25-39.

875 Cole, J., Nina, J. and Caraco, F. (1998) Atmospheric exchange of carbon dioxide in a  
876 low-wind oligotrophic lake measured by the addition of SF<sub>6</sub>. *Limnology and*  
877 *Oceanography* 43, 647-656.

878 Cook, P., Lamontagne, S., Berhane, D. and Clark, J. (2006) Quantifying groundwater  
879 discharge to Cockburn River, southeastern Australia, using dissolved gas tracers  
880 222Rn and SF<sub>6</sub>. *Water Resources Research* 42(10).

881 Cook, P.G., Favreau, G., Dighton, J.C. and Tickell, S. (2003) Determining natural  
882 groundwater influx to a tropical river using radon, chlorofluorocarbons and ionic  
883 environmental tracers. *Journal of Hydrology* 277(1-2), 74-88.

884 Corbett, D.R., Burnett, W.C., Cable, P.H. and Clark, S.B. (1997) Radon tracing of  
885 groundwater input into Par Pond, Savannah River site. *Journal of Hydrology* 203(1),  
886 209-227.

887 Cui, X., Ren, J., Qin, X., Sun, W., Yu, G., Wang, Z. and Liu, W. (2014) Chemical  
888 characteristics and environmental records of a snow-pit at the Glacier No. 12 in the  
889 Laohugou Valley, Qilian Mountains. *Journal of Earth Science* 25(2), 379-385.

890 Dansgaard, W. (1964) Stable isotopes in precipitation. *Tellus A* 16(4).

891 Dimova, N., Paytan, A., Kessler, J.D., Sparrow, K., Garcia-Tigreros Kodovska, F., Lecher,  
892 A.L., Murray, J. and Tulaczyk, S.M. (2015) The current magnitude and mechanisms of  
893 groundwater discharge in the Arctic: a case study from Alaska. *Environmental Science*  
894 *& Technology* 49(20), 12036-12043.

895 Dimova, N.T. and Burnett, W.C. (2011) Evaluation of groundwater discharge into small  
896 lakes based on the temporal distribution of radon-222. *Limnol. Oceanogr* 56(2),  
897 486-494.

898 Dimova, N.T., Burnett, W.C., Chanton, J.P. and Corbett, J.E. (2013) Application of  
899 radon-222 to investigate groundwater discharge into small shallow lakes. *Journal of*  
900 *Hydrology* 486, 112-122.

901 Downing, J.A. and McCauley, E. (1992) The nitrogen: phosphorus relationship in lakes.  
902 *Limnology and Oceanography* 37(5), 936-945.

903 Dubnick, A., Wadham, J., Tranter, M., Sharp, M., Orwin, J., Barker, J., Bagshaw, E. and  
904 Fitzsimons, S. (2017) Trickle or treat: The dynamics of nutrient export from polar  
905 glaciers. *Hydrological Processes* 31(9), 1776-1789.

906 Einarsdottir, K., Wallin, M.B. and Sobek, S. (2017) High terrestrial carbon load via  
907 groundwater to a boreal lake dominated by surface water inflow. *Journal of*  
908 *Geophysical Research: Biogeosciences* 122(1), 15-29.

909 Farinotti, D., Longuevergne, L., Moholdt, G., Duethmann, D., Molg, T., Bolch, T.,  
910 Vorogushyn, S. and Guntner, A. (2015) Substantial glacier mass loss in the Tien Shan  
911 over the past 50 years. *Nature Geosci* 8(9), 716-722.

912 Gat, J. (1995) *Physics and chemistry of lakes*, pp. 139-165, Springer.

913 Gat, J. (1996) Oxygen and hydrogen isotopes in the hydrologic cycle. *Annual Review*  
914 *of Earth and Planetary Sciences* 24(1), 225-262.

915 Genereux, D. (1998) Quantifying uncertainty in tracer-based hydrograph separations.  
916 *Water Resources Research* 34(4), 915-919.

917 Gibson, J., Edwards, T., Bursey, G. and Prowse, T. (1993) Estimating evaporation using  
918 stable isotopes: quantitative results and sensitivity analysis for. *Nordic Hydrology* 24,  
919 79-94.

920 Gibson, J.J. (2002) Short-term evaporation and water budget comparisons in shallow  
921 Arctic lakes using non-steady isotope mass balance. *Journal of Hydrology* 264(1),  
922 242-261.

923 Gibson, J.J., Birks, S.J. and Yi, Y. (2016) Stable isotope mass balance of lakes: a  
924 contemporary perspective. *Quaternary Science Reviews* 131, Part B, 316-328.

925 Gibson, J.J. and Edwards, T.W.D. (2002) Regional water balance trends and  
926 evaporation-transpiration partitioning from a stable isotope survey of lakes in  
927 northern Canada. *Global Biogeochemical Cycles* 16(2), 10-11-10-14.



928 Gilfedder, B., Frei, S., Hofmann, H. and Cartwright, I. (2015) Groundwater discharge  
929 to wetlands driven by storm and flood events: Quantification using continuous  
930 Radon-222 and electrical conductivity measurements and dynamic mass-balance  
931 modelling. *Geochimica Et Cosmochimica Acta* 165, 161-177.

932 Gonfiantini, R. (1986) Environmental isotopes in lake studies. *Handbook of*  
933 *environmental isotope geochemistry* 2, 113-168.

934 Good, S.P., Noone, D. and Bowen, G. (2015) Hydrologic connectivity constrains  
935 partitioning of global terrestrial water fluxes. *Science* 349(6244), 175-177.

936 Hagerthey, S.E. and Kerfoot, W.C. (1998) Groundwater flow influences the biomass  
937 and nutrient ratios of epibenthic algae in a north temperate seepage lake. *Limnology*  
938 *and Oceanography* 43(6), 1227-1242.

939 Harris, C., Arenson, L.U., Christiansen, H.H., Etzelmüller, B., Frauenfelder, R., Gruber,  
940 S., Haeberli, W., Hauck, C., Hölzle, M. and Humlum, O. (2009) Permafrost and climate  
941 in Europe: Monitoring and modelling thermal, geomorphological and geotechnical  
942 responses. *Earth-Science Reviews* 92(3), 117-171.

943 Hasler, C.T., Midway, S.R., Jeffrey, J.D., Tix, J.A., Sullivan, C. and Suski, C.D. (2016)  
944 Exposure to elevated pCO<sub>2</sub> alters post-treatment diel movement patterns of  
945 largemouth bass over short time scales. *Freshwater Biology* 61(9), 1590-1600.

946 Hawkings, J., Wadham, J., Tranter, M., Telling, J., Bagshaw, E., Beaton, A., Simmons,  
947 S.L., Chandler, D., Tedstone, A. and Nienow, P. (2016) The Greenland Ice Sheet as a  
948 hot spot of phosphorus weathering and export in the Arctic. *Global Biogeochemical*  
949 *Cycles*, 30(2), 191-210.

950 Heckmann, T., McColl, S. and Morche, D. (2015) Retreating ice: research in pro-glacial  
951 areas matters. *Earth Surface Processes and Landforms*, 41(2), 271-276.

952 Heckmann, T., McColl, S. and Morche, D. (2016) Retreating ice: research in pro-glacial  
953 areas matters. *Earth Surface Processes and Landforms* 41(2), 271-276.

954 Hodson, A. (2007) Phosphorus in glacial meltwaters. *Glacier Science and*  
955 *Environmental Change*, 81-82.

956 Hodson, A., Mumford, P., Kohler, J. and Wynn, P.M. (2005) The High Arctic glacial  
957 ecosystem: new insights from nutrient budgets. *Biogeochemistry* 72(2), 233-256.

958 Hood, J.L., Roy, J.W. and Hayashi, M. (2006) Importance of groundwater in the water  
959 balance of an alpine headwater lake. *Geophysical Research Letters* 33(13).

960 Hren, M.T., Bookhagen, B., Blisniuk, P.M., Booth, A.L. and Chamberlain, C.P. (2009)  
961  $\delta^{18}\text{O}$  and  $\delta\text{D}$  of streamwaters across the Himalaya and Tibetan Plateau: Implications  
962 for moisture sources and paleoelevation reconstructions. *Earth and Planetary*  
963 *Science Letters* 288(1), 20-32.

964 Hudson, J.J., Taylor, W.D. and Schindler, D.W. (2000) Phosphate concentrations in  
965 lakes. *Nature* 406(6791), 54-56.

966 Johannes, R.E. (1980) The Ecological Significance of the Submarine Discharge of  
967 Groundwater. *Marine Ecology-Progress Series* 3(4), 365-373.

968 Kim, G., Burnett, W.C., Dulaiova, H., Swarzenski, P.W. and Moore, W.S. (2001)  
969 Measurement of Ra-224 and Ra-226 activities in natural waters using a radon-in-air  
970 monitor. *Environmental Science & Technology* 35(23), 4680-4683.

971 Klaus, J. and McDonnell, J. (2013) Hydrograph separation using stable isotopes:  
972 Review and evaluation. *Journal of Hydrology* 505, 47-64.

973 Kluge, T., Ilmberger, J., Rohden, C.v. and Aeschbach-Hertig, W. (2007) Tracing and  
974 quantifying groundwater inflow into lakes using a simple method for radon-222  
975 analysis. *Hydrology and Earth System Sciences* 11(5), 1621-1631.

976 Kluge, T., von Rohden, C., Sonntag, P., Lorenz, S., Wieser, M., Aeschbach-Hertig, W.  
977 and Ilmberger, J. (2012) Localising and quantifying groundwater inflow into lakes  
978 using high-precision <sup>222</sup>Rn profiles. *Journal of Hydrology* 450, 70-81.

979 Kraemer, T.F. (2005) Radium isotopes in Cayuga Lake, New York: Indicators of inflow  
980 and mixing processes. *Limnology and Oceanography* 50(1), 158-168.

981 LaBaugh, J.W., Rosenberry, D.O. and Winter, T.C. (1995) Groundwater contribution to  
982 the water and chemical budgets of Williams Lake, Minnesota, 1980-1991. *Canadian*  
983 *Journal of Fisheries and Aquatic Sciences* 52(4), 754-767.

984 LaBaugh, J.W., Winter, T.C., Rosenberry, D.O., Schuster, P.F., Reddy, M.M. and Aiken,  
985 G.R. (1997) Hydrological and chemical estimates of the water balance of a closed-  
986 basin lake in north central Minnesota. *Water Resources Research* 33(12), 2799-2812.

987 Langston, G., Hayashi, M. and Roy, J.W. (2013) Quantifying groundwater-surface  
988 water interactions in a proglacial moraine using heat and solute tracers. *Water*  
989 *Resources Research* 49(9), 5411-5426.

990 Lazar, B., Weinstein, Y., Paytan, A., Magal, E., Bruce, D. and Kolodny, Y. (2008) Ra and  
991 Th adsorption coefficients in lakes—Lake Kinneret (Sea of Galilee)“natural  
992 experiment”. *Geochimica Et Cosmochimica Acta* 72(14), 3446-3459.

993 Lazhu, Yang, K., Wang, J., Lei, Y., Chen, Y., Zhu, L., Ding, B. and Qin, J. (2016)  
994 Quantifying evaporation and its decadal change for Lake Nam Co, central Tibetan  
995 Plateau. *Journal of Geophysical Research (Atmospheres)* 121, 7578-7591.

996 Lecher, A.L., Kessler, J., Sparrow, K., Garcia-Tigreros Kodovska, F., Dimova, N., Murray,  
997 J., Tulaczyk, S. and Paytan, A. (2015) Methane transport through submarine  
998 groundwater discharge to the North Pacific and Arctic Ocean at two Alaskan sites.  
999 *Limnology and Oceanography*, 61(S1).

1000 Lee, C.M., Jiao, J.J., Luo, X. and Moore, W.S. (2012) Estimation of submarine  
1001 groundwater discharge and associated nutrient fluxes in Tolo Harbour, Hong Kong.  
1002 *Science of the Total Environment* 433, 427-433.

1003 Lee, D.R. (1977) A device for measuring seepage flux in lakes and estuaries.

1004 Limnology and Oceanography 22(1), 140-147.

1005 Lee, D.R., Cherry, J.A. and Pickens, J.F. (1980) Groundwater transport of a salt tracer  
1006 through a sandy lakebed. Limnology and Oceanography 25(1), 45-61.

1007 Lehmkuhl, F. (1998) Extent and spatial distribution of Pleistocene glaciations in  
1008 eastern Tibet. Quaternary International 45–46, 123-134.

1009 Lei, Y., Yao, T., Yang, K., Sheng, Y., Kleinherenbrink, M., Yi, S., Bird, B.W., Zhang, X., Zhu,  
1010 L. and Zhang, G. (2017) Lake seasonality across the Tibetan Plateau and their varying  
1011 relationship with regional mass changes and local hydrology. Geophysical Research  
1012 Letters 44(2), 892-900.

1013 Lemieux, J.M., Sudicky, E.A., Peltier, W.R. and Tarasov, L. (2008a) Dynamics of  
1014 groundwater recharge and seepage over the Canadian landscape during the  
1015 Wisconsinian glaciation. Journal of Geophysical Research: Earth Surface (2003–2012)  
1016 113(F1).

1017 Lemieux, J.M., Sudicky, E.A., Peltier, W.R. and Tarasov, L. (2008b) Simulating the  
1018 impact of glaciations on continental groundwater flow systems: 1. Relevant processes  
1019 and model formulation. Journal of Geophysical Research: Earth Surface 113(F3),  
1020 n/a-n/a.

1021 Lemieux, J.M., Sudicky, E.A., Peltier, W.R. and Tarasov, L. (2008c) Simulating the  
1022 impact of glaciations on continental groundwater flow systems: 2. Model application  
1023 to the Wisconsinian glaciation over the Canadian landscape. Journal of Geophysical  
1024 Research: Earth Surface (2003–2012) 113(F3).

1025 Lerman, A., Imboden, D. and Gat, J. (1995) Physics and chemistry of lakes. New York.

1026 Levy, A., Robinson, Z., Krause, S., Waller, R. and Weatherill, J. (2015) Long-term  
1027 variability of proglacial groundwater-fed hydrological systems in an area of glacier  
1028 retreat, Skeiðarársandur, Iceland. Earth Surface Processes and Landforms 40(7),  
1029 981-994.

1030 Lewandowski, J., Meinikmann, K., Nützmann, G. and Rosenberry, D.O. (2015)  
1031 Groundwater – the disregarded component in lake water and nutrient budgets. Part  
1032 2: effects of groundwater on nutrients. Hydrological Processes 29(13), 2922-2955.

1033 Lewandowski, J., Meinikmann, K., Ruhtz, T., Pöschke, F. and Kirillin, G. (2013)  
1034 Localization of lacustrine groundwater discharge (LGD) by airborne measurement of  
1035 thermal infrared radiation. Remote Sensing of Environment 138, 119-125.

1036 Li, Y.H. and Gregory, S. (1974) Diffusion of Ions in Sea-Water and in Deep-Sea  
1037 Sediments. Geochimica Et Cosmochimica Acta 38(5), 703-714.

1038 Liu, C., Liu, J., Wang, X.S. and Zheng, C. (2015) Analysis of groundwater–lake  
1039 interaction by distributed temperature sensing in Badain Jaran Desert, Northwest  
1040 China. Hydrological Processes 30(9), 1330-1341.

1041 Liu, Y., Yao, T., Jiao, N., Tian, L., Hu, A., Yu, W. and Li, S. (2011) Microbial diversity in

1042 the snow, a moraine lake and a stream in Himalayan glacier. *Extremophiles* 15(3),  
1043 411-421.

1044 Luo, X. and Jiao, J.J. (2016) Submarine groundwater discharge and nutrient loadings  
1045 in Tolo Harbor, Hong Kong using multiple geotracer-based models, and their  
1046 implications of red tide outbreaks. *Water Research* 102, 11-31.

1047 Luo, X., Jiao, J.J., Liu, Y., Zhang, X., Liang, W. and Tang, D. (2018) Evaluation of Water  
1048 Residence Time, Submarine Groundwater Discharge, and Maximum New Production  
1049 Supported by Groundwater Borne Nutrients in a Coastal Upwelling Shelf System.  
1050 *Journal of Geophysical Research: Oceans* 123(1), 631-655.

1051 Luo, X., Jiao, J.J., Moore, W. and Lee, C.M. (2014) Submarine groundwater discharge  
1052 estimation in an urbanized embayment in Hong Kong via short-lived radium isotopes  
1053 and its implication of nutrient loadings and primary production. *Marine Pollution*  
1054 *Bulletin* 82(1), 144-154.

1055 Luo, X., Jiao, J.J., Wang, X.-s. and Liu, K. (2016) Temporal  $^{222}\text{Rn}$  distributions to reveal  
1056 groundwater discharge into desert lakes: implication of water balance in the Badain  
1057 Jaran Desert, China. *Journal of Hydrology* 534, 87-103.

1058 Luo, X., Jiao, J.J., Wang, X.-s., Liu, K., Lian, E. and Yang, S. (2017) Groundwater  
1059 discharge and hydrologic partition of the lakes in desert environment: Insights from  
1060 stable  $^{18}\text{O}/^{2}\text{H}$  and radium isotopes. *Journal of Hydrology* 546, 189-203.

1061 Ma, N., Zhang, Y., Szilagyi, J., Guo, Y., Zhai, J. and Gao, H. (2015) Evaluating the  
1062 complementary relationship of evapotranspiration in the alpine steppe of the  
1063 Tibetan Plateau. *Water Resources Research* 51(2), 1069-1083.

1064 MacIntyre, S., Wannikhof, R., Chanton, J.P., Matson, P.A. and Hariss, R.C. (1995)  
1065 Biogenic Trace Gases: Measuring Emissions from Soil and Water.

1066 Magnusson, J., Kobierska, F., Huxol, S., Hayashi, M., Jonas, T. and Kirchner, J.W. (2014)  
1067 Melt water driven stream and groundwater stage fluctuations on a glacier forefield  
1068 (Dammagletscher, Switzerland). *Hydrological Processes* 28(3), 823-836.

1069 Mitamura, O., Seike, Y., Kondo, K., Goto, N., Anbutsu, K., Akatsuka, T., Kihira, M.,  
1070 Tsering, T.Q. and Nishimura, M. (2003) First investigation of ultraoligotrophic alpine  
1071 Lake Puma Yumco in the pre-Himalayas, China. *Limnology* 4(3), 167-175.

1072 Moore, W.S. (1976) Sampling radium-228 in the deep ocean. *Deep Sea Res.* 23,  
1073 647-651.

1074 Nakayama, T. and Watanabe, M. (2008) Missing role of groundwater in water and  
1075 nutrient cycles in the shallow eutrophic Lake Kasumigaura, Japan. *Hydrological*  
1076 *Processes* 22(8), 1150-1172.

1077 Paytan, A., Lecher, A.L., Dimova, N., Sparrow, K.J., Kodovska, F.G.-T., Murray, J.,  
1078 Tulaczyk, S. and Kessler, J.D. (2015) Methane transport from the active layer to lakes  
1079 in the Arctic using Toolik Lake, Alaska, as a case study. *Proceedings of the National*

1080 Academy of Sciences 112(12), 3636-3640.

1081 Qiu, J. (2008) China: the third pole. *Nature News* 454(7203), 393-396.

1082 Quigley, M.A. and Robbins, J.A. (1986) Phosphorus release processes in nearshore  
1083 southern Lake Michigan. *Canadian Journal of Fisheries and Aquatic Sciences* 43(6),  
1084 1201-1207.

1085 Ren, W., Yao, T., Xie, S. and He, Y. (2017) Controls on the stable isotopes in  
1086 precipitation and surface waters across the southeastern Tibetan Plateau. *Journal of*  
1087 *Hydrology* 545, 276-287.

1088 Ren, W., Yao, T., Yang, X. and Joswiak, D.R. (2013) Implications of variations in  $\delta^{18}\text{O}$   
1089 and  $\delta\text{D}$  in precipitation at Madoi in the eastern Tibetan Plateau. *Quaternary*  
1090 *International* 313-314, 56-61.

1091 Rosenberry, D.O., Lewandowski, J., Meinikmann, K. and Nützmann, G. (2015)  
1092 Groundwater-the disregarded component in lake water and nutrient budgets. Part 1:  
1093 effects of groundwater on hydrology. *Hydrological Processes* 29(13), 2895-2921.

1094 Roy, J.W. and Hayashi, M. (2008) Groundwater exchange with two small alpine lakes  
1095 in the Canadian Rockies. *Hydrological Processes* 22(15), 2838-2846.

1096 Schafran, G.C. and Driscoll, C.T. (1993) Flow path-composition relationships for  
1097 groundwater entering an acidic lake. *Water Resources Research* 29(1), 145-154.

1098 Scheidegger, J.M. and Bense, V.F. (2014) Impacts of glacially recharged groundwater  
1099 flow systems on talik evolution. *Journal of Geophysical Research: Earth Surface*  
1100 119(4), 758-778.

1101 Schlutz, F. and Lehmkuhl, F. (2009) Holocene climatic change and the nomadic  
1102 Anthropocene in Eastern Tibet: palynological and geomorphological results from the  
1103 Nianbaoyeze Mountains. *Quaternary Science Reviews* 28(15-16), 1449-1471.

1104 Schmidt, A., Gibson, J.J., Santos, I.R., Schubert, M., Tattire, K. and Weiss, H. (2010)  
1105 The contribution of groundwater discharge to the overall water budget of two typical  
1106 Boreal lakes in Alberta/Canada estimated from a radon mass balance. *Hydrology and*  
1107 *Earth System Sciences* 14(1), 79-89.

1108 Sebok, E., Duque, C., Kazmierczak, J., Engesgaard, P., Nilsson, B., Karan, S. and  
1109 Frandsen, M. (2013) High-resolution distributed temperature sensing to detect  
1110 seasonal groundwater discharge into Lake Væng, Denmark. *Water Resources*  
1111 *Research* 49(9), 5355-5368.

1112 Shaw, R.D. and Prepas, E.E. (1990) Groundwater-lake interactions: I. Accuracy of  
1113 seepage meter estimates of lake seepage. *Journal of Hydrology* 119(1-4), 105-120.

1114 Slaymaker, O. (2011) Criteria to distinguish between periglacial, proglacial and  
1115 paraglacial environments. *Quaestiones Geographicae* 30(1), 85-94.

1116 Slomp, C.P. and Van Cappellen, P. (2004) Nutrient inputs to the coastal ocean through  
1117 submarine groundwater discharge: controls and potential impact. *Journal of*

1118 Hydrology 295(1-4), 64-86.

1119 Smerdon, B., Mendoza, C. and Devito, K. (2007) Simulations of fully coupled lake-  
1120 groundwater exchange in a subhumid climate with an integrated hydrologic model.  
1121 Water Resources Research 43(1).

1122 Stets, E.G., Winter, T.C., Rosenberry, D.O. and Striegl, R.G. (2010) Quantification of  
1123 surface water and groundwater flows to open- and closed-basin lakes in a  
1124 headwaters watershed using a descriptive oxygen stable isotope model. Water  
1125 Resources Research 46(3).

1126 Tockner, K., Malard, F., Uehlinger, U. and Ward, J. (2002) Nutrients and organic matter  
1127 in a glacial river-floodplain system (Val Roseg, Switzerland). Limnology and  
1128 Oceanography 47(1), 266-277.

1129 Valiela, I., Teal, J.M., Volkmann, S., Shafer, D. and Carpenter, E.J. (1978) Nutrient and  
1130 Particulate Fluxes in a Salt-Marsh Ecosystem - Tidal Exchanges and Inputs by  
1131 Precipitation and Groundwater. Limnology and Oceanography 23(4), 798-812.

1132 Wang, C., Dong, Z., Qin, X., Zhang, J., Du, W. and Wu, J. (2016a) Glacier meltwater  
1133 runoff process analysis using  $\delta D$  and  $\delta^{18}O$  isotope and chemistry at the remote  
1134 Laohugou glacier basin in western Qilian Mountains, China. Journal of Geographical  
1135 Sciences 26(6), 722-734.

1136 Wang, J., Zhu, L., Wang, Y., Ju, J., Xie, M. and Daut, G. (2010) Comparisons between  
1137 the chemical compositions of lake water, inflowing river water, and lake sediment in  
1138 Nam Co, central Tibetan Plateau, China and their controlling mechanisms. Journal of  
1139 Great Lakes Research 36(4), 587-595.

1140 Wang, R., Liu, Z., Jiang, L., Yao, Z., Wang, J. and Ju, J. (2016b) Comparison of surface  
1141 water chemistry and weathering effects of two lake basins in the Changtang Nature  
1142 Reserve, China. Journal of Environmental Sciences 41, 183-194.

1143 Wang, S. (1997) Frozen ground and environment in the Zoige Plateau and its  
1144 surrounding mountains (In Chinese with English abstract). Journal of Glaciology and  
1145 Geocryology 19(1), 39-46.

1146 Warner, N.R., Christie, C.A., Jackson, R.B. and Vengosh, A. (2013) Impacts of shale gas  
1147 wastewater disposal on water quality in western Pennsylvania. Environmental  
1148 Science & Technology 47(20), 11849-11857.

1149 Weynell, M., Wiechert, U. and Zhang, C. (2016) Chemical and isotopic (O, H, C)  
1150 composition of surface waters in the catchment of Lake Donggi Cona (NW China) and  
1151 implications for paleoenvironmental reconstructions. Chemical Geology 435, 92-107.

1152 White, D., Lapworth, D.J., Stuart, M.E. and Williams, P.J. (2016) Hydrochemical  
1153 profiles in urban groundwater systems: New insights into contaminant sources and  
1154 pathways in the subsurface from legacy and emerging contaminants. Science of the  
1155 Total Environment 562, 962-973.

1156 Wilson, J. and Rocha, C. (2016) A combined remote sensing and multi-tracer  
1157 approach for localising and assessing groundwater-lake interactions. *International*  
1158 *Journal of Applied Earth Observation and Geoinformation* 44, 195-204.

1159 Winter, T.C. (1999) Relation of streams, lakes, and wetlands to groundwater flow  
1160 systems. *Hydrogeology Journal* 7(1), 28-45.

1161 Wischniewski, J., Herzsuh, U., Rühland, K.M., Bräuning, A., Mischke, S., Smol, J.P.  
1162 and Wang, L. (2014) Recent ecological responses to climate variability and human  
1163 impacts in the Nianbaoyeze Mountains (eastern Tibetan Plateau) inferred from  
1164 pollen, diatom and tree-ring data. *Journal of Paleolimnology* 51(2), 287-302.

1165 Xin, W., Yongjian, D., Shiyin, L., Lianghong, J., Kunpeng, W., Zongli, J. and Wanqin, G.  
1166 (2013) Changes of glacial lakes and implications in Tian Shan, central Asia, based on  
1167 remote sensing data from 1990 to 2010. *Environmental Research Letters* 8(4),  
1168 044052.

1169 Yang, K., Wu, H., Qin, J., Lin, C., Tang, W. and Chen, Y. (2014) Recent climate changes  
1170 over the Tibetan Plateau and their impacts on energy and water cycle: A review.  
1171 *Global and Planetary Change* 112, 79-91.

1172 Yao, T., Masson-Delmotte, V., Gao, J., Yu, W., Yang, X., Risi, C., Sturm, C., Werner, M.,  
1173 Zhao, H., He, Y., Ren, W., Tian, L., Shi, C. and Hou, S. (2013) A review of climatic  
1174 controls on  $\delta^{18}\text{O}$  in precipitation over the Tibetan Plateau: Observations and  
1175 simulations. *Reviews of Geophysics* 51(4), 525-548.

1176 Yao, T., Thompson, L., Yang, W., Yu, W., Gao, Y., Guo, X., Yang, X., Duan, K., Zhao, H.,  
1177 Xu, B., Pu, J., Lu, A., Xiang, Y., Kattel, D.B. and Joswiak, D. (2012) Different glacier  
1178 status with atmospheric circulations in Tibetan Plateau and surroundings. *Nature*  
1179 *Clim. Change* 2(9), 663-667.

1180 Yao, Z., Wang, R., Liu, Z., Wu, S. and Jiang, L. (2015) Spatial-temporal patterns of  
1181 major ion chemistry and its controlling factors in the Manasarovar Basin, Tibet.  
1182 *Journal of Geographical Sciences* 25(6), 687-700.

1183 Yuan, H., Liu, E., Shen, J., Zhou, H., Geng, Q. and An, S. (2014) Characteristics and  
1184 origins of heavy metals in sediments from Ximen Co Lake during summer monsoon  
1185 season, a deep lake on the eastern Tibetan Plateau. *Journal of Geochemical*  
1186 *Exploration* 136, 76-83.

1187 Zhang, B., Wu, Y., Zhu, L., Wang, J., Li, J. and Chen, D. (2011) Estimation and trend  
1188 detection of water storage at Nam Co Lake, central Tibetan Plateau. *Journal of*  
1189 *Hydrology* 405(1-2), 161-170.

1190 Zhang, C. and Mischke, S. (2009) A Lateglacial and Holocene lake record from the  
1191 Nianbaoyeze Mountains and inferences of lake, glacier and climate evolution on the  
1192 eastern Tibetan Plateau. *Quaternary Science Reviews* 28(19), 1970-1983.

1193 Zhang, G., Yao, T., Piao, S., Bolch, T., Xie, H., Chen, D., Gao, Y., O'Reilly, C.M., Shum, C.

1194 and Yang, K. (2017a) Extensive and drastically different alpine lake changes on Asia's  
1195 high plateaus during the past four decades. *Geophysical Research Letters* 44(1),  
1196 252-260.

1197 Zhang, G., Yao, T., Shum, C., Yi, S., Yang, K., Xie, H., Feng, W., Bolch, T., Wang, L. and  
1198 Behrangi, A. (2017b) Lake volume and groundwater storage variations in Tibetan  
1199 Plateau's endorheic basin. *Geophysical Research Letters* 44(11), 5550-5560.

1200 Zhang, G., Yao, T., Xie, H., Kang, S. and Lei, Y. (2013) Increased mass over the Tibetan  
1201 Plateau: from lakes or glaciers? *Geophysical Research Letters* 40(10), 2125-2130.

1202 Zhang, Y., Liu, C., Tang, Y. and Yang, Y. (2007) Trends in pan evaporation and reference  
1203 and actual evapotranspiration across the Tibetan Plateau. *Journal of Geophysical*  
1204 *Research: Atmospheres* (1984–2012) 112(D12).

1205 Zhou, S., Kang, S., Chen, F. and Joswiak, D.R. (2013) Water balance observations  
1206 reveal significant subsurface water seepage from Lake Nam Co, south-central Tibetan  
1207 Plateau. *Journal of Hydrology* 491, 89-99.

1208 Zlotnik, V.A., Olaguera, F. and Ong, J.B. (2009) An approach to assessment of flow  
1209 regimes of groundwater-dominated lakes in arid environments. *Journal of Hydrology*  
1210 371(1), 22-30.

1211 Zlotnik, V.A., Robinson, N.I. and Simmons, C.T. (2010) Salinity dynamics of discharge  
1212 lakes in dune environments: Conceptual model. *Water Resources Research* 46(11).

1213 Zongxing, L., Qi, F., Wei, L., Tingting, W., Xiaoyan, G., Zongjie, L., Yan, G., Yanhui, P.,  
1214 Rui, G. and Bing, J. (2015) The stable isotope evolution in Shiyi glacier system during  
1215 the ablation period in the north of Tibetan Plateau, China. *Quaternary International*  
1216 380, 262-271.

1217

1218

1219

## 1220 **Figure captions**

1221

1222 **Figure 1** The geological and topographic map of the Yellow River Source Region,  
1223 Nianbaoyeze glacial mountains (a), and the sampling settings of the Ximen Co Lake  
1224 (b), with the bathymetry map of the lake (d). (c) Photograph of the Ximen Co Lake  
1225 and the surrounding geomorphic settings looking northeast direction on 22 Aug 2015,  
1226 showing the late-laying snowpack in the U-shaped valleys of the north part of  
1227 Nianbaoyeze MT.

1228



1229 **Figure 2** The climatological parameters (wind speed, air temperature, and  
1230 precipitation) in the Aug, 2015 recorded from Jiuzhi weather station.

1231

1232 **Figure 3** The temporal distributions of  $^{222}\text{Rn}$  (a), water temperature (b), water level  
1233 fluctuation recorded by the divers (c), and hourly wind speed and air temperature  
1234 recorded in Jiuzhi weather station (d).

1235

1236 **Figure 4** The cross plots of  $\text{Cl}^-$  versus  $\text{Na}^+$  (a),  $\text{SO}_4^{2-}$  versus  $\text{Cl}^-$  (b),  $\text{Ca}^{2+}$  versus  $\text{Cl}^-$   
1237 (c); The relations of  $^2\text{H}$  versus  $^{18}\text{O}$  (d),  $\text{Cl}^-$  versus  $^2\text{H}$  (e), and  $\text{Cl}^-$  versus  $^{18}\text{O}$  (f).

1238

1239 **Figure 5** Cross plots of  $^{222}\text{Rn}$  versus DIN (a) and DIP (b).

1240

1241 **Figure 6** The conceptual model of  $^{222}\text{Rn}$  transient model (a), and three endmember  
1242 model (b).

1243

1244 **Figure 7** The results of the final LGD derived from  $^{222}\text{Rn}$  transient model.

1245

1246 **Figure 8** The hydrologic partition of the proglacial lake of Ximen CO (a), and the  
1247 budgets of DIN (b) and DIP (c).

1248

1249

1250

1251

1252

1253

1254

1255

1256

1257

1258 Figure 1

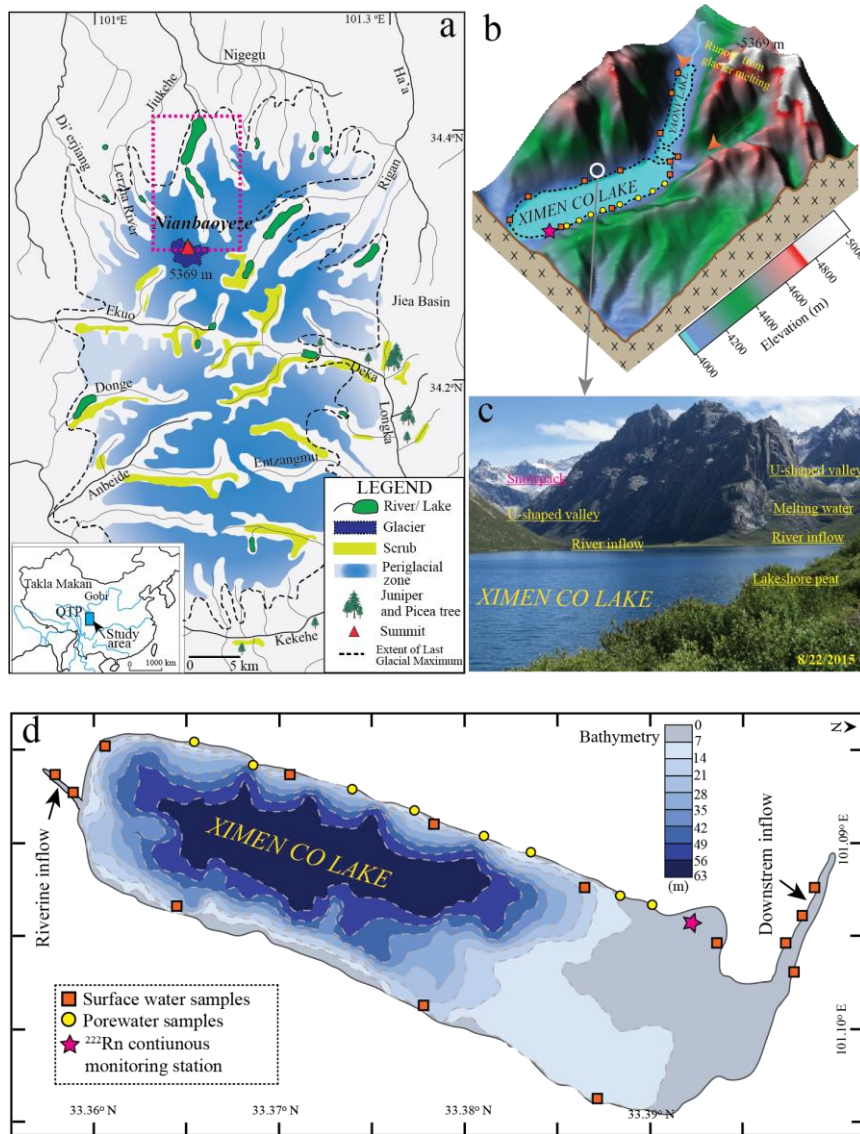

1259

1260

1261

1262

1263

1264 Figure 2

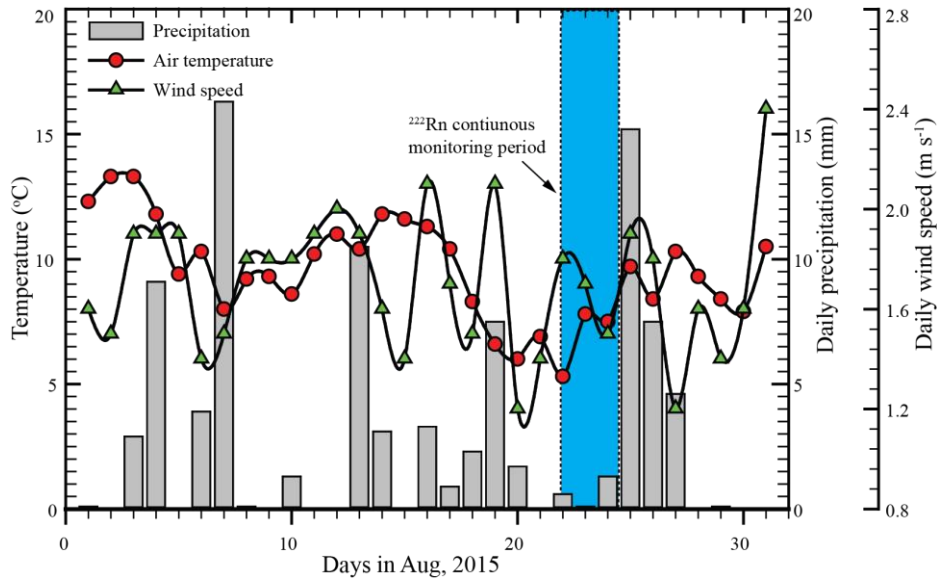

1265

1266

1267

1268

1269

1270

1271

1272

1273

1274

1275

1276

1277

1278 Figure 3

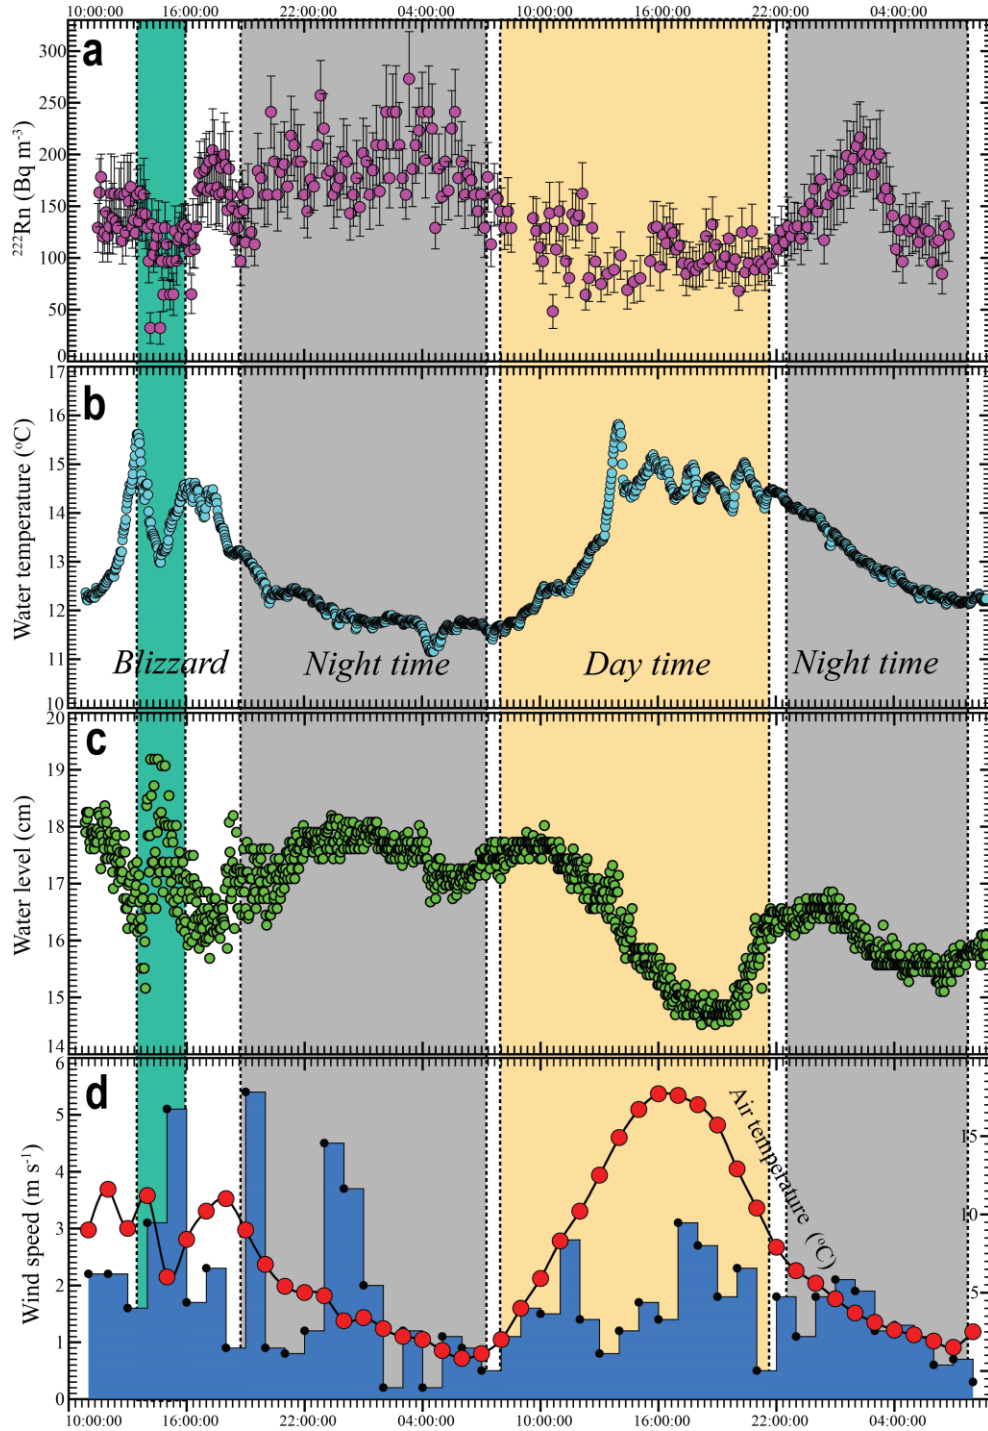

1279

1280

1281 **Figure 4**

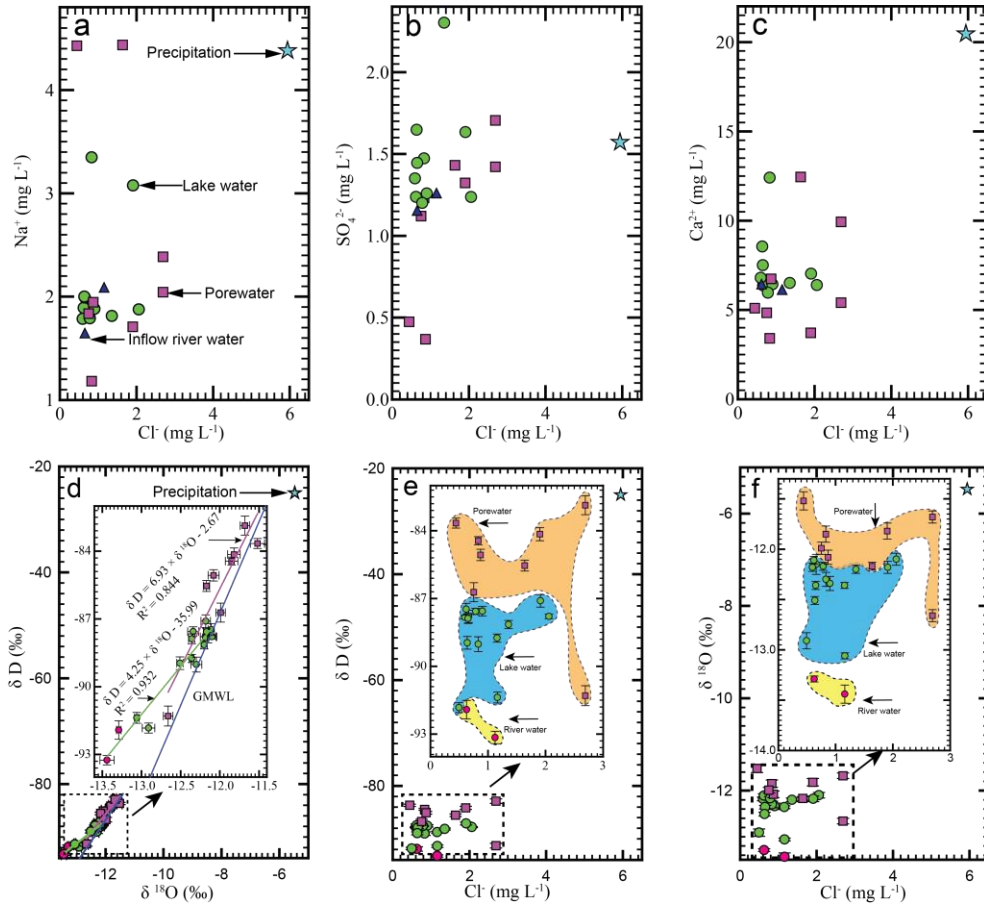

1282

1283

1284

1285

1286

1287

1288

1289

1290 **Figure 5**

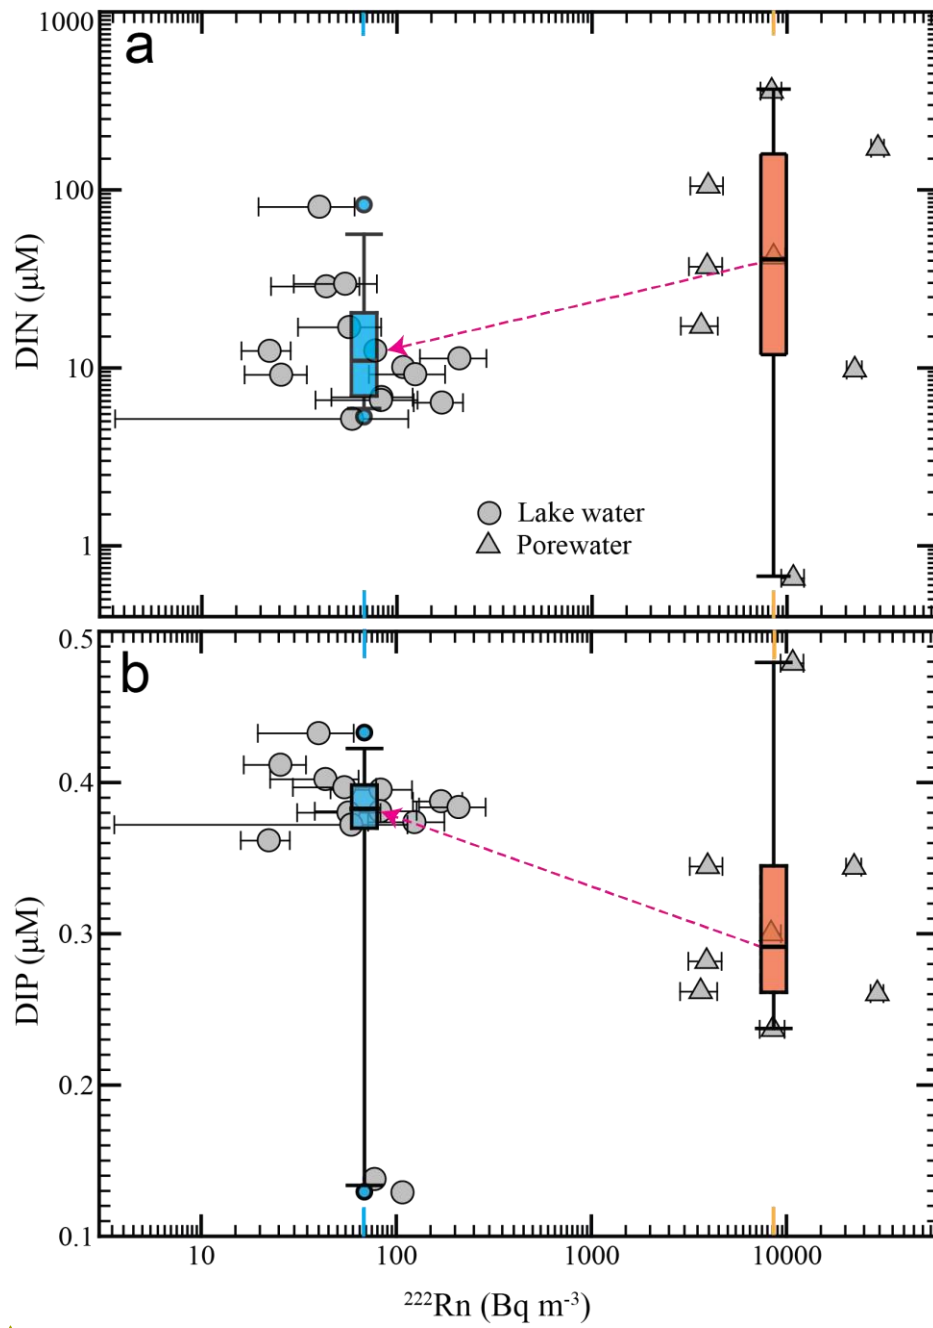

1291

1292

Formatted: Font: (Default) Times New Roman, (Asian) 宋体, 11 pt

Formatted: Indent: Left: 0 cm, Hanging:

1293

1294 Figure 6

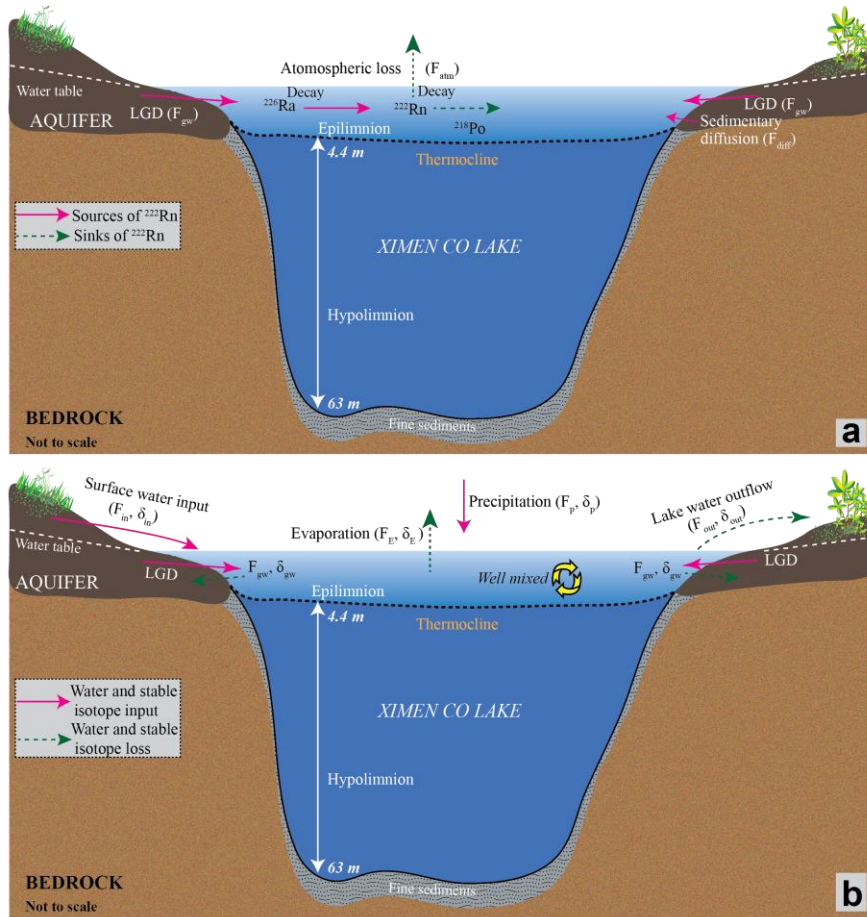

Deleted: .

- 
- 
- 

1295

1296

1297

1298

1299

1300

1301

1306

1307 Figure 7

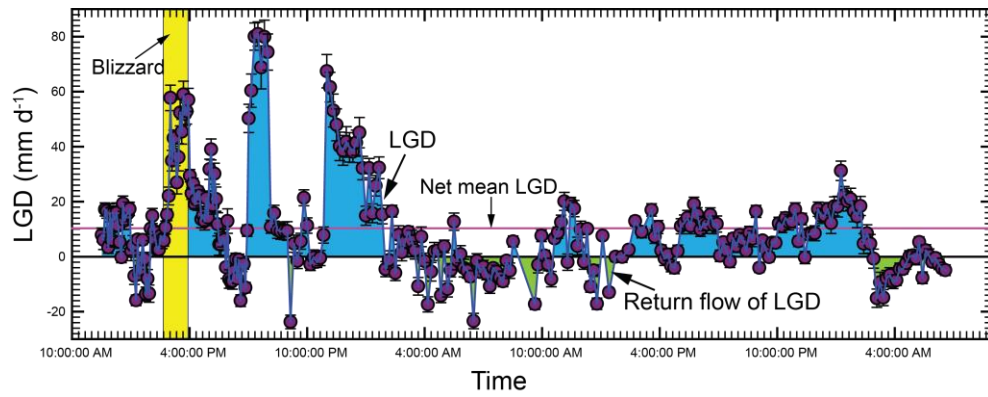

1308

1309

1310

1311

1312

1313

1314

1315

1316

1317

1318

1319

1320



1321

1322 Figure 8

**a** Hydrologic partitioning

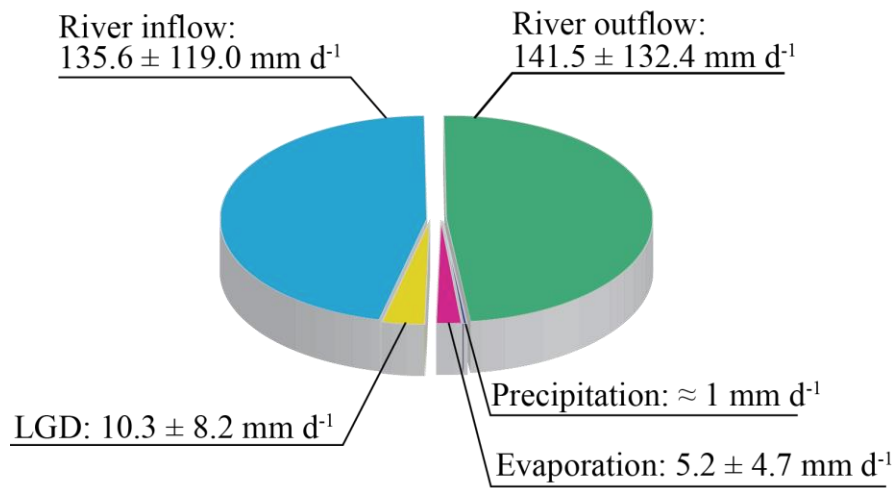

**b** DIN ( $\mu\text{mol m}^{-2} \text{d}^{-1}$ )

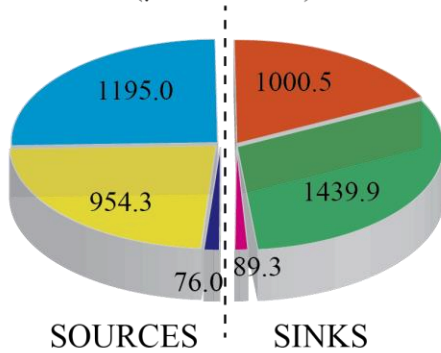

**c** DIP ( $\mu\text{mol m}^{-2} \text{d}^{-1}$ )

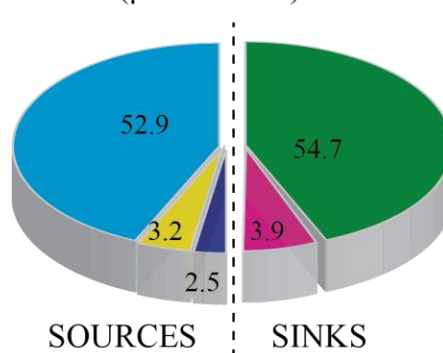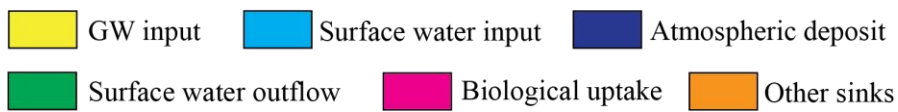

1323
